1 **A cross-tissue, age-specific flow cytometry reference for immune cells in the airways and**  
2 **blood of children**

3 Shivanthan Shanthikumar<sup>1,2,3</sup>, Liam Gubbels<sup>1</sup>, Karen Davies<sup>4</sup>, Hannah Walker<sup>1,2,5</sup>, Anson Tsz  
4 Chun Wong<sup>1,2</sup>, Jovana Maksimovic<sup>6,7</sup>, Alicia Oshlack<sup>6,7,8</sup>, Richard Saffery<sup>1,2</sup>, Eric Levi<sup>4,9</sup>,  
5 Sarath C. Ranganathan<sup>1,2,3</sup>, Melanie R. Neeland<sup>1,2</sup>

6 <sup>1</sup> Infection, Immunity and Global Health, Murdoch Children's Research Institute, Parkville, VIC, Australia.

7 <sup>2</sup> Department of Paediatrics, University of Melbourne, Parkville, VIC, Australia.

8 <sup>3</sup> Respiratory and Sleep Medicine, Royal Children's Hospital, Parkville, VIC, Australia.

9 <sup>4</sup> Otolaryngology, Royal Children's Hospital, Parkville, VIC, Australia.

10 <sup>5</sup> Children's Cancer Centre, Royal Children's Hospital, Parkville, VIC, Australia.

11 <sup>6</sup> Computational Biology Program, Peter MacCallum Cancer Centre, Parkville, VIC, Australia.

12 <sup>7</sup> Sir Peter MacCallum Department of Oncology, University of Melbourne, Parkville, VIC, Australia.

13 <sup>8</sup> School of Mathematics and Statistics, University of Melbourne, Parkville, VIC, Australia.

14 <sup>9</sup> Clinical Sciences, Murdoch Children's Research Institute, Parkville, VIC, Australia.

15 **ABSTRACT**

16 Respiratory diseases are a common cause of morbidity and hospitalisation for children.  
17 Despite this, treatment options are limited and are often ineffective. The development of  
18 curative or disease-modifying treatments for children relies on a better understanding of  
19 underlying immunity in the early airway. To establish a flow cytometry reference for immune  
20 cells in the paediatric airway, we analysed 178 samples from 66 children aged between 1-15  
21 years. This included five tissues of the upper (nasal brushings, palatine tonsils, adenotonsil)  
22 and lower (bronchial brushings, bronchoalveolar lavage (BAL)) airway, as well as whole  
23 blood for paired analysis of local and systemic immune response. Nasal, bronchial, and  
24 alveolar samples were analysed using a 17-plex antibody panel that captures cells of immune  
25 and epithelial lineage, while tonsil, adenoid, and blood samples were analysed using a 31-  
26 plex antibody panel that extensively phenotypes mononuclear immune cells. All protocols,  
27 panels, and data are openly available, to facilitate implementation in paediatric clinical  
28 laboratories. We provide age-specific cell reference data for infancy (0-2 years), preschool (3-  
29 5 years), childhood (6-10 years) and adolescence (11-15 years) for 37 cell populations. We  
30 show tissue-specific maturation of the airway immune system across childhood, further  
31 highlighting the importance of developing age-specific references of the paediatric airway.  
32 Intra-individual, cross-tissue analysis of paired samples revealed marked correlation in  
33 immune cell proportions between paired nasal-bronchial samples, paired tonsil-adenoid  
34 samples, and paired adenoid-blood samples, which may have implications for clinical testing.  
35 Our study advances knowledge of airway immunity from infancy through to adolescence and  
36 provides an openly available control dataset to aid in interpretation of clinical findings in  
37 samples obtained from children with respiratory diseases.

38 **INTRODUCTION**

39 Respiratory diseases are a major source of morbidity and hospitalisation in children  
40 worldwide. They not only cause significant short-term effects but may also have lifelong  
41 impacts on lung function <sup>1</sup>. Despite this, treatment options for children are limited, largely  
42 extrapolated from adults, and often confer little to no clinical benefit. This is due, in part, to  
43 limited understanding of the mechanisms that underly disease in children and a lack of age-  
44 specific reference ranges for cells and soluble factors present in the paediatric airway.

45 A lack of age-specific, reliable reference ranges for children extends beyond the respiratory  
46 system into all aspects of paediatric health care <sup>2, 3</sup>. Many of the available reference intervals  
47 were determined over three decades ago using technologies that are no longer relevant in a  
48 clinical setting. Despite considerable efforts to address this in recent years, current paediatric  
49 reference ranges remain largely incomplete <sup>4</sup>. The development of age-specific reference  
50 ranges is particularly crucial in paediatric respiratory medicine due to the marked age-related  
51 differences in susceptibility and immunological response to a range of infectious and chronic  
52 conditions of the lung. This was recently highlighted during the COVID-19 pandemic, with  
53 children showing a markedly mild manifestation of disease compared to adults <sup>5</sup>, and is also  
54 observed for other conditions including RSV infection <sup>6</sup>, wheezing, and asthma <sup>7</sup>. A better  
55 understanding of immune cell composition in the healthy paediatric airway may help to  
56 identify diagnostic biomarkers of disease, targets for anti-inflammatory therapy, and inform  
57 novel interventions such as mucosal vaccination.

58 We aimed to develop a clinically relevant age-specific flow cytometry reference for immune  
59 cells in the upper and lower airways of children. Our secondary aims were to explore changes  
60 in immune cell composition in the first 15 years of life, understand the relationship between  
61 airway and systemic immunity, and discover cross-tissue relationships in immune cell  
62 proportions within individuals.

## 63 **RESULTS**

### 64 **1. Establishing a clinical reference for immune cells in airways and blood of** 65 **children**

66 To establish a reference for immune cells in the paediatric airway, we sampled five tissues  
67 comprising both the upper airway (nasal brushings, palatine tonsils, adenotonsil), and lower  
68 airway (bronchial brushings, BAL) from 66 children undergoing general anaesthesia at the  
69 Royal Children’s Hospital Melbourne. The clinical indications for these procedures are  
70 provided in Supplementary Table 1, with >80% of the cohort undergoing a procedure for  
71 obstructive sleep apnoea (OSA). Medical history and information on respiratory status from  
72 parent questionnaires are provided in Supplementary Table 2. These children were aged  
73 between 1 and 15 years, allowing for age stratification across infancy (0-2 years), preschool  
74 period (3-5 years), childhood (6-10 years), and adolescence (11-15 years) (Figure 1A).  
75 Furthermore, where possible, multiple airway samples were collected per participant,  
76 allowing for intra-individual, cross-tissue assessment of immunity in the upper and lower  
77 airway. We also analysed whole blood in order to establish a reference panel of circulating  
78 immune cells and to enable associations between the systemic and respiratory immune  
79 systems in childhood. Airway and blood samples were processed to single-cell suspensions  
80 and analysed by spectral flow cytometry using two multiplexed panels (Figure 1B). The first  
81 panel, comprising 17 markers, captures cell populations present in nasal, bronchial, and  
82 alveolar samples (Supplementary Table 3). These cell types include those of both immune  
83 and epithelial lineage (Figure 1C). The second panel, comprising 31 markers, captures  
84 immune cell populations present in the palatine tonsil (“tonsil”), adenotonsil (“adenoid”), and  
85 blood samples (Supplementary Table 4). These include all major immune cell populations  
86 and their subtypes, with a focus on B- and T- cell lineages given the role of tonsils and  
87 adenoids as major lymphoid niches (Figure 1D). We designed publicly available sample  
88 processing and flow cytometry protocols ([protocols.io/workspaces/earlyAIR](https://protocols.io/workspaces/earlyAIR)) with the goal  
89 they could be implemented in paediatric clinical laboratories.

### 90 **2. Immune cell landscape of paediatric nasal, bronchial, and alveolar samples**

91 Epithelial and immune cell populations were identified in nasal, bronchial, and alveolar  
92 samples based on expression of 16 key lineage markers (Figure 2A-C, Supplementary Figure  
93 1). Immune cell populations identified were neutrophils, eosinophils, macrophages, NK cells,  
94 NK-T cells, CD8 T cells, CD4 T cells, B cells, monocytes, and conventional dendritic cells

95 (cDCs). In all compartments, the immune cell lineage outnumbered the epithelial lineage,  
96 particularly more distally through the airway (Figure 2D-F). In nasal samples, immune cells  
97 comprised a median of 74.3% of all cells, bronchial samples 88%, and alveolar samples 98%  
98 (Figure 2D-F). Median proportions of the 10 major immune cell subtypes in each sample type  
99 are shown in Figure 2G-I. To help develop age-specific references for each of these tissues,  
100 the median and range of each cell population are reported by clinically relevant age groups  
101 (all ages (age 1-15 years), infancy (0-2 years), preschool (3-5 years), childhood (6-10 years),  
102 adolescence (11-15 years)) and presented in Tables 1-3. For nasal samples, all five age  
103 analyses are reported (Table 1). For bronchial and alveolar samples, due to more limited  
104 numbers, a subset of these age groups is reported (Tables 2-3).

### 105 **3. Immune cell landscape of paediatric tonsil, adenoid, and blood samples.**

106 Immune cell populations were identified in tonsil, adenoid and whole blood samples based on  
107 expression of 22 lineage markers (Figure 3A-C, Supplementary Figure 2). In tonsils and  
108 adenoids, 25 immune cell populations were quantified, and in whole blood 30 immune cell  
109 populations were quantified. Additional populations observed in blood that were not observed  
110 in tonsil/adenoid tissue include eosinophils, CD56<sup>bright</sup> subsets of NK cells and subsets of  
111 CD16 expressing monocytes including non-classical and intermediate monocytes. On the  
112 other hand, germinal centre (GC) B cells, one of the most abundant populations in tonsils and  
113 adenoids, were not observed in blood. Mean Fluorescence Intensity (MFI) analysis of marker  
114 expression revealed differential surface receptor patterns across the three compartments  
115 including: CD24 expression on NK and NK-T cells from adenoid and tonsil tissue that is not  
116 observed on the respective blood populations; high expression of CD38 on T cell populations  
117 in tissue: and CXCR5 expression NK-T cells in tissue (Figure 3A-C). Median proportions of  
118 immune cell populations in all tonsil, adenoid, and blood samples are shown in Figure 3D-F,  
119 respectively. To help develop age-specific references for each of these tissues, the median and  
120 range of each cell population are reported by clinically relevant age groups (all ages, infancy,  
121 preschool, childhood, adolescence) and presented in Tables 4-6.

### 122 **4. Airway and blood immune cell dynamics over the first 15 years of life**

123 To identify age-specific cellular associations, we performed two-tailed spearman correlation  
124 analyses on cell proportion data in each tissue from children aged 1-15 years. No significant  
125 age associations for immune cell populations were seen in nasal or alveolar samples after  
126 correction for the false discovery rate. In contrast, for bronchial samples, macrophages and

127 NK-T cells increased with age (spearman coefficient ( $\rho$ )=0.80, FDR-P=0.002;  $\rho$ =0.63, FDR-  
128 P=0.03, respectively) while a subset of neutrophils expressing intermediate levels of  
129 activation marker CD66b and high levels of CD16 reduced with age ( $\rho$ = -0.71, FDR-P=0.01)  
130 (Figure 4A). In tonsil samples, transitional B cells decreased with age ( $\rho$ = -0.62, FDR-  
131 P=0.002), while classical memory B cells, CD8 TEM cells and CD4 Thelper cells increased  
132 with age ( $\rho$ =0.51, FDR-P=0.02;  $\rho$ =0.47, FDR-P=0.04;  $\rho$ =0.63, FDR-P=0.002, respectively)  
133 (Figure 4B). The same associations with age were also observed in adenoid samples, where  
134 transitional B cells decreased with age ( $\rho$ = -0.51, FDR-P=0.007) and classical memory B  
135 cells, CD8 TEM and CD4 Thelper cells increased with age ( $\rho$ =0.43, FDR-P=0.02;  $\rho$ =0.52,  
136 FDR-P=0.006;  $\rho$ =0.62, FDR-P=0.0008, respectively) (Figure 4C). Additionally, four other  
137 adenoid immune cells were also associated with age. These were GC B cells and T follicular  
138 helper (TFH) cells which decreased with age ( $\rho$ = -0.41, FDR-P=0.03;  $\rho$ = -0.42, FDR-P=0.02,  
139 respectively), and non-switched memory B cells and NK-T cells which increased with age  
140 ( $\rho$ =0.69, FDR-P=0.0008;  $\rho$ =0.62, FDR-P=0.0008, respectively) (Figure 4C). Like the tonsil  
141 and adenoid tissue, blood transitional B cells, NK- T cells, and CD4 Thelper cells were also  
142 associated with age ( $\rho$ = -0.52, FDR-P=0.001;  $\rho$ =0.47, FDR-P=0.005;  $\rho$ =0.44, FDR-P=0.009,  
143 respectively) (Figure 4D). Blood neutrophils increased with age ( $\rho$ = 0.40, FDR-P=0.02),  
144 while intermediate monocytes and cDCs decreased with age ( $\rho$ = -0.42, FDR-P=0.01;  $\rho$ = -  
145 0.38, FDR-P=0.02) (Figure 4D). Blood CD4 TN cells decreased with age ( $\rho$ =-0.34, FDR-  
146 P=0.049) and CD8 TEM cells also tended to increase with age ( $\rho$ =0.31, raw-P=0.04, FDR-  
147 P=0.09). Individual dot plots depicting correlations for each significant cell type in each  
148 tissue are presented in Supplementary Figures 3 and 4.

149 These results demonstrate maturation of the airway immune system with age, centred around  
150 the development of memory B cells, memory CD8 T cells, and CD4 T effector populations.  
151 Notably, NK-T cell proportions were also highly dynamic, increasing significantly with age  
152 in three locations (bronchial, adenoid, and blood) as well as in the alveolar region albeit not  
153 significantly when correcting for FDR ( $\rho$ =0.88, raw-P=0.007, FDR-P=0.1).

## 154 **5. Cross-tissue analysis of cell type proportions in the upper and lower airway**

155 We next directly compared the composition of immune cells across nasal, bronchi, and  
156 alveolar regions. As can be seen in Figure 5A, cell type proportions vary throughout the  
157 airway, with granulocytes (neutrophils and eosinophils) more highly abundant in nasal and  
158 bronchial tissues; a progressive increase in the proportions of macrophages down the airway;

159 and a shift from CD8 T cell dominance in nasal samples to more equal CD8:CD4 T cell ratios  
160 in the alveolar region. Cross-sectional statistical analysis showed that proportions of  
161 granulocytes were significantly higher in both the nasal and bronchial samples when  
162 compared to alveolar samples (Figure 5B). Macrophage proportions were significantly higher  
163 in bronchial compared to nasal, in alveolar compared to nasal, and in alveolar compared to  
164 bronchial samples (Figure 5B). Regarding lymphocytes, CD8 T cells and B cells were  
165 significantly higher in the nasal than the alveolar samples, and NK-T cells were significantly  
166 lower in nasal samples when compared to bronchial samples (Figure 5B). The list of  
167 significant cell types and their associated medians and FDR-P values are reported in  
168 Supplementary Table 5.

169 As we had collected multiple sample types per participant, we were able to test for  
170 correlations in immune cell proportions between the upper and lower airway in the same  
171 individuals. Due to limited numbers of paired BAL-nasal, and paired BAL-bronchial  
172 samples, we could not perform this analysis for these sample types. However, we were able  
173 to perform cross-tissue analysis for paired nasal and bronchial samples (n=13), paired nasal  
174 and blood samples (n=29) and paired bronchial and blood samples (n=15). This revealed that  
175 nasal and bronchial samples were highly correlated within individuals, with positive  
176 correlations observed between eosinophils (spearman coefficient ( $\rho$ )=0.85, FDR-P=0.002),  
177 neutrophils ( $\rho$ =0.64, FDR-P=0.03), CD4 T cells ( $\rho$ =0.70, FDR-P=0.02), CD8 T cells ( $\rho$ =0.69,  
178 FDR-P=0.02), monocytes ( $\rho$ =0.72, FDR-P=0.02) and cDCs ( $\rho$ =0.92, FDR-P=0.0002) in the  
179 nasal and bronchial samples (Figure 5C). On the contrary, we observed no statistical  
180 correlation in immune cell proportions between blood and nasal samples within individuals,  
181 and only NK-T cells were significantly correlated between blood and bronchial samples  
182 ( $\rho$ =0.72, FDR-P=0.03) (Figure 5C). All correlation coefficients and FDR-P values are  
183 reported in Supplementary Table 6.

## 184 **6. Cross-tissue analysis of cell type proportions in the upper airway lymphoid tissue**

185 Next, we directly compared the composition of immune cells across tonsil, adenoid, and  
186 blood compartments. As can be seen in Figure 6A, tonsil and adenoid cell compositions were  
187 similar, particularly for NK-T cells, innate lymphoid cells (ILCs), all CD8 T cell subsets, all  
188 CD4 T cell subsets and Tregulatory cells. Blood samples showed higher frequencies of innate  
189 immune cells, NK/ILCs, as well as naïve CD8- and CD4- T cells, and lower frequencies of  
190 TFH cells and the B cell lineage when compared to tonsils and adenoids (Figure 6A,

191 statistical comparison presented in Supplementary Figure 5). Cross-sectional statistical  
192 comparison of tonsils vs adenoids showed that plasmablasts, GC B cells, and neutrophils  
193 were significantly higher in tonsils compared to adenoids, while pDCs, NK cells, classical  
194 memory B cells, and non-switched memory B cells were significantly higher in adenoids  
195 compared to tonsils (Figure 6B). The list of significant cell types and their associated  
196 medians and FDR-P values are reported in Supplementary Table 7.

197 Finally, we tested for correlations in immune cell proportions between tonsil, adenoid, and  
198 blood compartments in paired samples collected from the same individuals (Figure 6C).  
199 There were 27 children with paired tonsil and adenoid samples, 25 children with paired tonsil  
200 and blood samples, and 30 children with paired adenoid and blood samples. This cross-tissue  
201 analysis revealed that tonsil and adenoid samples were highly correlated within individuals,  
202 with positive associations observed between 19/25 immune cell populations identified in the  
203 lymphoid tissues (Figure 6C). Similarly, blood cells also correlated with cells in the upper  
204 airway lymphoid tissue, especially evident for the adenoids where 7/24 populations were  
205 positively correlated (Figure 6C). Blood cell proportions positively correlated with tonsil cell  
206 proportions for atypical memory B cells, transitional B cells, and CD8 TN within individuals.  
207 Blood cell proportions positively correlated with adenoid cell proportions for atypical  
208 memory B cells, classical memory B cells, plasma cells, CD8 TCM, CD8 TEM, naïve Tregs  
209 and pDCs within individuals. All correlation coefficients and associated FDR-P values are  
210 reported in Supplementary Table 8.



## 211 **DISCUSSION**

212 In recent years, there has been an explosion in the development of single-cell sequencing  
213 based tissue atlases, including a global consortium dedicated to profiling the lung <sup>8</sup>. These  
214 studies have provided an unprecedented level of resolution into gene expression of individual  
215 cells across many populations. However, due to the extensive laboratory and specialist  
216 computational pipelines required for analysis of single-cell sequencing data, these tools are  
217 many years away from application in clinical laboratories. Flow cytometry is routinely used  
218 in the diagnosis and assessment of human disease globally, and permits multi-dimensional,  
219 high-throughput quantification of millions of cells without the requirement for specialist  
220 computational analysis <sup>9</sup>. To our knowledge, we have developed the first flow cytometry-  
221 based reference for immune cells in the airways of children. This includes detailed  
222 assessment of cell populations in the nose, upper airway lymphoid tissue, as well as the lower  
223 airway epithelium and alveolar space; a detailed analysis of surface markers present on each  
224 cell population in each tissue; and investigation of cell frequencies across time and space. We  
225 also present a reference for immune cells in whole blood samples collected from the same  
226 children. The goal of this work was to understand the relationship between airway and  
227 systemic immunity from paired paediatric samples, however we also hope it adds valuable  
228 data to other efforts investigating immune development in blood, including fresh whole blood  
229 <sup>10</sup>, cryopreserved whole blood <sup>11</sup>, and cryopreserved PBMC <sup>12</sup> samples. To facilitate the  
230 application and implementation of our tissue references, all protocols, flow cytometry panels,  
231 and data are openly available.

232 Our results show tissue-specific maturation of the airway immune system with age. For  
233 example, we did not show changes in immune cell proportions throughout childhood in nasal  
234 samples, however a marked increase in macrophages and NK-T cells were observed during  
235 childhood in bronchial samples. We were fascinated to find strikingly high immune:epithelial  
236 cell ratios in nasal and bronchial brushings samples, particularly the high proportions of  
237 neutrophils. A recent study that used single-cell sequencing to profile immune cells in nasal  
238 swabs from children with SARS-CoV-2 infection as well as non-infected controls reported  
239 similar findings. They showed that while immune cells were rarely detected in nasal swabs  
240 from healthy adults, samples from healthy children contained high amounts of immune cell  
241 subsets with an overall dominance of neutrophils <sup>13</sup>. Regarding the lymphoid tissues, both  
242 tonsil and adenoid samples showed increases in classical memory B cells, CD8 TEM cells  
243 and CD4 Thelper cells with age, as well as a decrease in transitional B cells. Adenoid cells,



244 however, appeared more influenced by age, with additional significant associations observed  
245 in germinal centre B cells, non-switched memory B cells, NK-T cells and TFH cells. Similar  
246 age-related changes in airway lymphoid tissues have been observed previously, particularly  
247 related to germinal centre development in tonsils<sup>14</sup>. For blood immune cells, we replicate  
248 what has been observed in another study focusing on lymphocyte populations from a large  
249 number of paediatric whole blood samples where plasmablasts, transitional B cells, and CD4  
250 T naïve cells decreased with age and CD4 Thelper cells increased with age<sup>10</sup>. We  
251 additionally show that whole blood NK-T cells, neutrophils, cDCs, and intermediate  
252 monocytes are also associated with age. Collectively, these age-related changes in immune  
253 cell composition further highlight the importance of developing age-specific references for  
254 the airways and blood of children. This work also highlights that many single-cell sequencing  
255 based tissue atlases that primarily consist of samples obtained from adults may not be  
256 applicable to children, and we support the efforts of the Pediatric Cell Atlas to include data  
257 that samples the complete human lifespan<sup>15</sup>.

258 Our intra-individual cross-tissue analysis revealed high correlation in immune cell  
259 proportions between tissues, particularly for paired nasal and bronchial samples, paired tonsil  
260 and adenoid samples, and paired adenoid and blood samples. These findings suggest that  
261 easily accessible nasal samples could be used as a surrogate for assessment of immunity in  
262 the lower airway of children. If validated in future studies, this could have important  
263 implications for clinical testing, and potentially prevent risks associated with general  
264 anaesthesia to sample the lower airway. The remarkable correlation in immune cell  
265 composition between the tonsils and adenoids is likely explained by the fact both tissues are  
266 part of Waldeyer's ring of pharyngeal lymphoid organs.

267 We acknowledge the limitations of our dataset, in particular the limited number of BAL  
268 samples which did not permit age-related or cross-tissue analysis for this sample type. This is  
269 due to the difficulties in obtaining these lower airway samples from children, as well as  
270 limitations in sample volumes for research testing. However, we were able to obtain samples  
271 from a larger number of children for all other sample types (n=17-49), and these numbers are  
272 similar to or above that of other immunological studies using paediatric respiratory specimens  
273<sup>13, 16-18</sup>. We also acknowledge that these samples were collected as part of clinically indicated  
274 procedures, which means that not all samples can be considered 'healthy'. The main  
275 indication in our cohort was OSA, with >80% of samples obtained from children exhibiting  
276 or undergoing investigation for this indication. While this may contribute to some variation in

277 tonsil or adenoid immune cell proportions<sup>18</sup>, the effect of this underlying condition on results  
278 obtained from distal sample types in these children (nasal brushings, bronchial brushings,  
279 blood) is unclear. A recent review revealed conflicting evidence of immune cell alterations in  
280 adult and paediatric OSA, with some studies reporting an inflammatory effect while others  
281 reported normal immune responses in these patients<sup>19</sup>. All children in our cohort were  
282 clinically well at the time of sample collection and there was limited evidence of wheezing or  
283 respiratory infection in the week leading up to sample collection. Parent questionnaires  
284 revealed that the majority of children in our cohort had never been prescribed respiratory  
285 medications, and of those prescribed, rates of medication use were similar to what is observed  
286 in the Australian community for children aged 0-15years<sup>20</sup>. Likewise, rates of conditions  
287 including general atopy, asthma, and eczema, were similar to a recent population-based study  
288 of Australian children<sup>21</sup>. As general anaesthesia is required to collect many of the sample  
289 types included in our study, creating control respiratory datasets from healthy children in the  
290 community is not feasible, especially datasets that include multiple sample types from the  
291 same individual, Our reference can be used as control data for clinical samples collected from  
292 children with acute (e.g. infectious), rare (e.g. cystic fibrosis, primary ciliary dyskinesia) and  
293 chronic (e.g. suppurative lung disease) respiratory conditions.

294 In summary, this study advances our knowledge of airway immunity from infancy through to  
295 adolescence and provides an easily adaptable, publicly available control dataset to aid in  
296 interpretation of clinical samples obtained from children with respiratory disease.

## 297 **MATERIALS AND METHODS**

298

### 299 **Study participants**

300 This study took place at the Royal Children’s Hospital (RCH, Melbourne Australia) and  
301 involved analysis of 178 samples from 66 children (Figure 1A, Supplementary Table 1) aged  
302 between 1 and 15 years. Samples were collected at the time of clinically indicated procedures  
303 (bronchoscopy, tonsillectomy and/or adenoidectomy). Reasons for procedures are detailed in  
304 Supplementary Table 1 and medical history from parent questionnaires are summarised in  
305 Supplementary Table 2.

### 306 **Collection and processing of samples**

307 Samples were collected at the time of clinically indicated procedures (bronchoscopy,  
308 tonsillectomy and/or adenoidectomy). For palatine tonsils (“tonsils”) and adenotonsils  
309 (“adenoids”), tissues were removed by the operating team as per standard operating  
310 procedures, suspended in RPMI media supplemented with 2% fetal calf serum (FCS), and  
311 transferred on ice to the laboratory immediately upon collection. For nasal brushings, samples  
312 were collected by a respiratory physician using a 3mm cytology brush at the time of the  
313 procedure, suspended in cold RPMI media supplemented with 2% FCS and transferred on ice  
314 to the laboratory immediately upon collection. Bronchial brushings were collected by a  
315 respiratory physician using a 2mm cytology brush and suspended in cold RPMI media  
316 supplemented with 2% FCS and transferred on ice to the laboratory immediately upon  
317 collection. Bronchoscopy and bronchoalveolar lavage (BAL) were performed as previously  
318 described where indicated for investigation of stridor<sup>22</sup>. This study used BAL from aliquots  
319 two and three from the right middle lobe. BAL samples were transferred on ice to the  
320 laboratory immediately upon collection. Venous blood was collected in EDTA tubes at the  
321 time of the procedure and transferred to the laboratory at room temperature immediately upon  
322 collection. Multiple sample types were collected from each individual (Figure 1A).

323 Detailed protocols for the collection, processing and flow cytometry analysis of each sample  
324 type are openly available at: [protocols.io/workspaces/earlyAIR](https://protocols.io/workspaces/earlyAIR). Briefly, cells were dislodged  
325 off nasal and bronchial brushes into media by pipetting for at least 1 minute. Cells were  
326 filtered through a 70µM cell strainer into a new 15mL tube and centrifuged at 300xg for 7  
327 minutes at 4 degrees. Cells were counted using the LUNA-FL Dual Fluorescence cell counter  
328 and washed once more before 300,000 cells were aliquoted for flow cytometry as described

329 below. BAL samples were centrifuged at 300xg for 7 minutes at 4 degrees. The cell-free  
330 supernatant was removed and cells were resuspended in 10mL of media. Cells were filtered  
331 through a 70µM cell strainer into a new 15mL tube and centrifuged at 300xg for 7 minutes at  
332 4 degrees. Cells were counted using the LUNA-FL cell counter and washed once more before  
333 300,000 cells were aliquoted for flow cytometry as described below. Tonsil and adenoid  
334 samples were processed in glass culture plates with 10mL of media. First, visible blood clots,  
335 fat and connective tissue were removed using forceps and scissors. Next, the tissues were  
336 minced into a fine paste using scissors in a fresh glass plate with fresh media and filtered  
337 through a 100µm cell strainer into a 50mL tube. Cells were centrifuged at 400xg for 5  
338 minutes at room temperature and resuspended in 8mL of fresh media prior to layering onto  
339 Ficoll plaque plus as per the manufacturer's instructions. Cells were centrifuged at 400xg for  
340 30 minutes at room temperature with a slow acceleration and no brake. Cells at the interface  
341 between media and the Ficoll solution were collected into a new 15mL tube and washed with  
342 media before counting using the LUNA-FL cell counter. Due to the large number of cells  
343 collected, cells were diluted between 1:10-1:100 prior to counting. Finally, 500,000 cells  
344 were aliquoted for flow cytometry as described below.

#### 345 **Flow cytometry of nasal brushings, bronchial brushings, and BAL samples**

346 Nasal, bronchial and BAL cells were resuspended in PBS for viability staining using near  
347 infra-red viability dye according to manufacturers' instructions. The viability dye reaction  
348 was stopped by the addition of FACS buffer (2% heat-inactivated FCS in PBS) and cells were  
349 centrifuged at 400xg for 5 mins 4°C. Cells were resuspended in 25µL human FC-block  
350 (diluted 1:10) for 5 minutes at room temperature. The flow cytometry staining panel  
351 described in Supplementary Table 3 (made up at 2X concentration) was added 1:1 with the  
352 cells and incubated for 30 minutes on ice. Following staining, cells were washed with 1mL  
353 FACS buffer and centrifuged at 400xg for 5 minutes 4°C. Cells were resuspended in 150µL  
354 FACS buffer for acquisition using the Cytex 5L Aurora. The gating strategy used to define  
355 cell types obtained with this panel is depicted in Supplementary Figure 1.

#### 356 **Flow cytometry of tonsils, adenoids, and whole blood samples**

357 Tonsil, adenoid and lysed whole blood cells were resuspended in PBS for viability staining  
358 using near UV-blue viability dye according to manufacturers' instructions. The viability dye  
359 reaction was stopped by the addition of FACS buffer and cells were centrifuged at 400xg for  
360 5 mins 4°C. Cells were resuspended in 40µL human FC-block (diluted 1:10) for 5 minutes at

361 room temperature, following which 10µL of Brilliant Stain Buffer Plus was added. The  
362 chemokine panel described in Supplementary Table 4A (made up at 3X concentration) was  
363 added at 25µL per sample and cells incubated for 10 minutes at room temperature in the dark.  
364 The panel described in Supplementary Table 4B (made up at 3X concentration) was added at  
365 50µL per sample and cells incubated for 30 minutes at room temperature in the dark.  
366 Following staining, cells were washed with 1mL FACS buffer and centrifuged at 400xg for 5  
367 minutes 4°C. Cells were resuspended in 150µL FACS buffer for acquisition using the Cytex  
368 5L Aurora. The gating strategy used to define cell types obtained with this panel is depicted  
369 in Supplementary Figure 2. The panel described in Supplementary Table 4 is a modified  
370 version of the published OMIP-069<sup>23</sup>.

### 371 **Data analysis**

372 Gating of flow cytometry data was performed in FlowJo version 10.9.0. As samples were  
373 acquired fresh on the day of collection over multiple batches, all data was normalised using  
374 the cyCombine plugin<sup>24</sup>. For each tissue type, cell populations were annotated based on  
375 expression of known lineage markers included in each panel (see gating strategies for each  
376 tissue in the Supplement). Cell population frequencies were expressed as a proportion of live,  
377 single cells or as a proportion of live, single, CD45<sup>+</sup> cells when referring to analysis of  
378 immune cell types only. For age-specific immune cell reference ranges (Tables 1-6), median  
379 frequencies (% of live, single, CD45<sup>+</sup> cells) were calculated for each cell type within each  
380 age group (0-2years, 3-5 years, 6-10 years, 11-15 years) and the ranges also reported. For  
381 unsupervised analyses, a single concatenated file was created for each tissue type, containing  
382 10,000 downsampled cells from each participant. These concatenated files were used for  
383 Uniform Manifold Approximation and Projection (UMAP) analysis (using the default settings  
384 of the UMAP plugin for FlowJo) and to calculate the median fluorescence intensity (MFI) of  
385 each lineage marker for each cell type in each tissue. Hierarchical clustering analysis and  
386 heatmap visualisation of the MFI data was done using the pheatmap package in R Studio  
387 version 4.3.0. For cross-sectional statistical analysis, cell proportions were compared using  
388 Mann Whitney U-tests. All p-values were corrected for false discovery rate using the  
389 Benjamini and Hochberg approach<sup>25</sup>. An FDR corrected p<0.05 and a fold change of >1.5  
390 was required to reach statistical significance. Age and intra-individual correlations were  
391 determined using two-tailed spearman tests. Spearman P-values were corrected for false  
392 discovery rate using the Benjamini and Hochberg approach. An FDR corrected p<0.05 was  
393 required to reach statistical significance.

394 **Ethics statement**

395 The studies involving human participants were reviewed and approved by Royal Children’s  
396 Hospital Human Research Ethics Committee (HREC #25054 and # 88144). Written informed  
397 consent to participate in the studies was provided by the participants’ legal guardian/next of  
398 kin.

## 399 References

- 400 1. Stocks, J., Hislop, A. & Sonnappa, S. Early lung development: lifelong effect on  
401 respiratory health and disease. *Lancet Respir Med* **1**, 728-742 (2013).
- 402 2. Schnabl, K., Chan, M.K., Gong, Y. & Adeli, K. Closing the gaps in paediatric  
403 reference intervals: the CALIPER initiative. *Clin Biochem Rev* **29**, 89-96 (2008).
- 404 3. Tosato, F. *et al.* Lymphocytes subsets reference values in childhood. *Cytometry. Part*  
405 *A : the journal of the International Society for Analytical Cytology* **87**, 81-85 (2015).
- 406 4. Lyle, A.N. *et al.* Current State of Pediatric Reference Intervals and the Importance of  
407 Correctly Describing the Biochemistry of Child Development: A Review. *Jama*  
408 *Pediatr* **176**, 699-714 (2022).
- 409 5. Zimmermann, P. & Curtis, N. Why is COVID-19 less severe in children? A review of  
410 the proposed mechanisms underlying the age-related difference in severity of SARS-  
411 CoV-2 infections. *archdischild-2020-320338* (2020).
- 412 6. Coultas, J.A., Smyth, R. & Openshaw, P.J. Respiratory syncytial virus (RSV): a  
413 scourge from infancy to old age. *Thorax* **74**, 986-993 (2019).
- 414 7. Morris, I. *et al.* Which intravenous bronchodilators are being administered to children  
415 presenting with acute severe wheeze in the UK and Ireland? *Thorax* **70**, 88-91 (2015).
- 416 8. Sikkema, L. *et al.* An integrated cell atlas of the lung in health and disease. *Nature*  
417 *Medicine* **29**, 1563-1577 (2023).
- 418 9. Virgo, P.F. & Gibbs, G.J. Flow cytometry in clinical pathology. *Annals of Clinical*  
419 *Biochemistry* **49**, 17-28 (2012).
- 420 10. Ding, Y. *et al.* Reference values for peripheral blood lymphocyte subsets of healthy  
421 children in China. *J Allergy Clin Immunol* **142**, 970-973.e978 (2018).
- 422 11. Olin, A. *et al.* Stereotypic Immune System Development in Newborn Children. *Cell*  
423 **174**, 1277-1292.e1214 (2018).
- 424 12. Jalali, S. *et al.* A high-dimensional cytometry atlas of peripheral blood over the human  
425 life span. *Immunol Cell Biol* **100**, 805-821 (2022).
- 426 13. Loske, J. *et al.* Pre-activated antiviral innate immunity in the upper airways controls  
427 early SARS-CoV-2 infection in children. *Nat Biotechnol* **40**, 319-324 (2022).
- 428 14. Massoni-Badosa, R. *et al.* An atlas of cells in the human tonsil. *Immunity* **57**, 379-  
429 399.e318 (2024).
- 430 15. Taylor, D.M. *et al.* The Pediatric Cell Atlas: Defining the Growth Phase of Human  
431 Development at Single-Cell Resolution. *Developmental Cell* **49**, 10-29 (2019).
- 432 16. King, H.W. *et al.* Single-cell analysis of human B cell maturation predicts how  
433 antibody class switching shapes selection dynamics. *Science immunology* **6** (2021).
- 434 17. Neeland, M.R. *et al.* Pulmonary immune profiling reveals common inflammatory  
435 endotypes of childhood wheeze and suppurative lung disease. *Mucosal Immunol*  
436 (2024).
- 437 18. Carrasco, A. *et al.* The Tonsil Lymphocyte Landscape in Pediatric Tonsil Hyperplasia  
438 and Obstructive Sleep Apnea. *Frontiers in immunology* **12**, 674080 (2021).
- 439 19. Ludwig, K., Huppertz, T., Radsak, M. & Gouveris, H. Cellular Immune Dysfunction  
440 in Obstructive Sleep Apnea. *Front Surg* **9**, 890377 (2022).
- 441 20. Welfare, A.I.o.H.a. Asthma. (2023).
- 442 21. Peters, R.L. *et al.* The Prevalence of IgE-Mediated Food Allergy and Other Allergic  
443 Diseases in the First 10 Years: The Population-Based, Longitudinal HealthNuts Study.  
444 *The journal of allergy and clinical immunology. In practice* (2024).
- 445 22. Sly, P.D. *et al.* Risk factors for bronchiectasis in children with cystic fibrosis. *N Engl J*  
446 *Med* **368**, 1963-1970 (2013).



- 447 23. Park, L.M., Lannigan, J. & Jaimes, M.C. OMIP-069: Forty-Color Full Spectrum Flow  
448 Cytometry Panel for Deep Immunophenotyping of Major Cell Subsets in Human  
449 Peripheral Blood. *Cytometry A* **97**, 1044-1051 (2020).  
450 24. Pedersen, C.B. *et al.* cyCombine allows for robust integration of single-cell cytometry  
451 datasets within and across technologies. *Nat Commun* **13**, 1698 (2022).  
452 25. Benjamini, Y. & Hochberg, Y. Controlling the False Discovery Rate - a Practical and  
453 Powerful Approach to Multiple Testing. *J R Stat Soc B* **57**, 289-300 (1995).

454

455

#### 456 **ACKNOWLEDGEMENTS**

457 This work was funded by a Chan Zuckerberg Initiative Single-Cell Biology Grant (2021-  
458 237883). We thank the children and parents who participated in our studies, without whom  
459 this work would not exist.

460

461

## 462 **FIGURE LEGENDS**

463 **Figure 1.** Overview of the experimental design and cellular landscape of each tissue. (A) 66  
464 children aged between 1 and 15 years were recruited into the earlyAIR study. There were 10  
465 infants (age 0-2 years), 21 preschoolers (age 3-5 years), 22 children (6-10 years), and 13  
466 adolescents (11-15 years). From these 66 children, 178 samples were collected across six  
467 tissue types: nasal brushings (n=37), bronchial brushings (n=17), bronchoalveolar lavage  
468 (BAL) (n=8), adenoids (n=36), tonsils (n=31), and whole blood (n=49). (B) Each sample type  
469 was processed into a single-cell suspension and analysed by spectral flow cytometry. Nasal  
470 brushing, bronchial brushing, and BAL samples were analysed using a 17-plex lung panel.  
471 Tonsil, adenoid, and whole blood samples were analysed using a 31-plex tonsil-adenoid-  
472 blood panel. (C) Uniform Manifold Approximation and Projection (UMAP) plots showing  
473 the cellular landscape of nasal, bronchial and alveolar cells identified using the lung panel.  
474 (D) UMAP plots showing the cellular landscape of tonsil, adenoid, and blood cells identified  
475 using the tonsil-adenoid-blood panel.

476 **Figure 2.** Marker expression and proportion of cell populations identified in paediatric nasal,  
477 bronchial, and alveolar samples. (A) Heatmap depicting hierarchical clustering analysis of the  
478 normalised median fluorescence intensity (MFI) of 16 lineage markers on cell types  
479 identified in nasal brushings samples. (B) Heatmap depicting hierarchical clustering analysis  
480 of the normalised MFI of 16 lineage markers on cell types identified in bronchial brushings  
481 samples. (C) Heatmap depicting hierarchical clustering analysis of the normalised MFI of 16  
482 lineage markers on cell types identified in BAL samples. (D) Proportion of immune and  
483 epithelial lineages in nasal brushings samples. (E) Proportion of immune and epithelial lineages  
484 in bronchial brushings samples. (F) Proportion of immune and epithelial lineages in BAL  
485 samples. (G) Box plots depicting individual cell proportions for 10 broad immune cell types  
486 identified in nasal brushings samples (H) Box plots depicting individual cell proportions for  
487 10 broad immune cell types identified in bronchial brushings samples. (I) Box plots depicting  
488 individual cell proportions for 10 broad immune cell types identified in BAL samples. P-  
489 values determined by Mann-Whitney U-test where  $p < 0.05$  was considered significant.

490 **Figure 3.** Marker expression and proportion of cell populations identified in paediatric tonsil,  
491 adenoid, and whole blood samples. (A) Heatmap depicting hierarchical clustering analysis of  
492 the normalised median fluorescence intensity (MFI) of 22 lineage markers on cell types  
493 identified in tonsils. (B) Heatmap depicting hierarchical clustering analysis of the normalised  
494 MFI of 22 lineage markers on cell types identified in adenoids. (C) Heatmap depicting  
495 hierarchical clustering analysis of the normalised MFI of 22 lineage markers on cell types  
496 identified in blood. (D) Box plots depicting individual cell proportions for 25 immune cell  
497 types identified in tonsils. (E) Box plots depicting individual cell proportions for 25 immune  
498 cell types identified in adenoids. (F) Box plots depicting individual cell proportions for 30  
499 immune cell types identified in whole blood samples.

500 **Figure 4.** Immune cell type proportions in bronchial, tonsil, adenoid and blood samples are  
501 associated with age. (A) Spearman coefficient ( $\rho$ ) and FDR-corrected p-values for nasal  
502 immune cell types significantly associated with age: CD66b<sup>low</sup>CD16<sup>+</sup> neutrophils,  
503 macrophages, and NK-T cells. (B) Spearman  $\rho$  and FDR-corrected p-values for bronchial  
504 immune cell types significantly associated with age: transitional B cells, classical memory B  
505 cells, CD8 T<sub>EM</sub>, and CD4 Thelper cells. (C) Spearman  $\rho$  and FDR-corrected p-values for  
506 adenoid immune cell types significantly associated with age: germinal centre B cells,  
507 transitional B cells, non-switched memory B cells, classical memory B cells, CD4 Thelper  
508 cells, NK-T cells, CD8 T<sub>EM</sub>, and TFH cells. (D) Spearman  $\rho$  and FDR-corrected p-values for  
509 blood immune cell types significantly associated with age: plasmablasts, transitional B cells,

510 NK-T cells, CD4 TN cells, CD4 Thelper cells, neutrophils, intermediate monocytes, and  
511 cDCs. Note there were no significant correlations with age for cell types in nasal or alveolar  
512 samples. Correlation p-values were determined by two-tailed spearman test and corrected for  
513 false discovery rate using the Benjamini Hochberg approach. FDR-P<0.05 was considered  
514 significant.

515 **Figure 5.** Cross-tissue analysis of cell type proportion in lung and blood compartments  
516 reveals high correlation between upper and lower airway brushings but limited correlation  
517 between the lung and blood in children. **(A)** Median immune cell type proportion in nasal,  
518 bronchial, and alveolar samples for granulocytes (left panel), myeloid cells (centre panel) and  
519 lymphocytes (right panel). **(B)** Volcano plots depicting cross-sectional statistical analysis of  
520 cell types in nasal\_vs\_bronchial samples (left panel), nasal\_vs\_alveolar samples (centre  
521 panel), and bronchial\_vs\_alveolar samples (right panel). **(C)** Ballon plot depicting intra-  
522 individual correlations of cell type proportions for participants who had nasal, bronchial, and  
523 blood samples analysed. \* Depicts significant correlation. NA: Not Applicable, as  
524 macrophages are not present in blood. Cross-sectional p-values (part B) were determined by  
525 Mann-Whitney U-test and corrected for false discovery rate using the Benjamini Hochberg  
526 approach. FDR p<0.05 and fold change >1.5 was considered significant. Intra-individual  
527 correlation p-values (part C) were determined by two-tailed spearman test and corrected for  
528 false discovery rate using the Benjamini Hochberg approach. FDR-P<0.05 was considered  
529 significant.

530 **Figure 6.** Cross-tissue analysis of cell type proportion in tonsil, adenoid and blood  
531 compartments reveals sample-type specific immune cell profiles and an intra-individual  
532 tonsil-adenoid-blood immune cell axis in children. **(A)** Median immune cell type proportion  
533 in tonsil, adenoid, and blood samples for granulocytes and myeloid cells (first panel), innate  
534 lymphocytes (second panel), CD8 T cell populations (third panel), CD4 T cell populations  
535 (fourth panel) and B cell populations (fifth panel). **(B)** Volcano plot depicting cross-sectional  
536 statistical analysis of cell types in tonsil\_vs\_adenoid samples. **(C)** Ballon plot depicting intra-  
537 individual correlations of cell type proportions for participants who had tonsil, adenoid, and  
538 blood samples analysed. \* Depicts significant correlation. NA: Not Applicable, as GC B cells  
539 are not present in blood. Cross-sectional p-values (part B) were determined by Mann-  
540 Whitney U-test and corrected for false discovery rate using the Benjamini Hochberg  
541 approach. FDR p<0.05 and fold change >1.5 was considered significant. Intra-individual  
542 correlation p-values (part C) were determined by two-tailed spearman test and corrected for  
543 false discovery rate using the Benjamini Hochberg approach. FDR-P<0.05 was considered  
544 significant.

545 **Table 1.** Immune cell subtype frequency in nasal brushings samples from children aged 0-15  
 546 years.

| <b>NASAL IMMUNE CELLS</b>                                               | <b>0-15 years (n=37)</b> | <b>0-2 years (n=5)</b> | <b>3-5 years (n=16)</b> | <b>6-10 years (n=12)</b> | <b>11-15 years (n=4)</b> |
|-------------------------------------------------------------------------|--------------------------|------------------------|-------------------------|--------------------------|--------------------------|
| <b>Total granulocytes</b><br>%CD45 <sup>+</sup> cells<br>Median (range) | 31.72<br>(2.92-88.20)    | 29.09<br>(23.42-79.66) | 46.03<br>(6.93-79.63)   | 20.40<br>(2.92-88.20)    | 51.67<br>(42.28-64.37)   |
| <b>Eosinophils</b><br>%CD45 <sup>+</sup> cells<br>Median (range)        | 0.22<br>(0.01-31.62)     | 0.34<br>(0.16-0.50)    | 0.16<br>(0.02-2.16)     | 0.61<br>(0.01-31.62)     | 0.63<br>(0.02-21.92)     |
| <b>Neutrophils</b><br>%CD45 <sup>+</sup> cells<br>Median (range)        | 28.17<br>(2.51-78.26)    | 28.17<br>(20.55-71.76) | 42.84<br>(6.83-78.26)   | 14.35<br>(2.51-60.89)    | 43.52<br>(39.82-52.74)   |
| <b>Macrophages</b><br>%CD45 <sup>+</sup> cells<br>Median (range)        | 0.99<br>(0.27-13.63)     | 1.16<br>(0.30-8.37)    | 0.78<br>(0.27-9.69)     | 1.14<br>(0.46-13.63)     | 1.16<br>(0.79-3.29)      |
| <b>NK cells</b><br>%CD45 <sup>+</sup> cells<br>Median (range)           | 0.64<br>(0.12-3.96)      | 1.03<br>(0.48-2.9)     | 0.74<br>(0.12-3.96)     | 0.42<br>(0.15-3.39)      | 0.59<br>(0.31-0.60)      |
| <b>NK-T cells</b><br>%CD45 <sup>+</sup> cells<br>Median (range)         | 0.16<br>(0.01-2.23)      | 0.27<br>(0.06-2.23)    | 0.10<br>(0.04-1.02)     | 0.13<br>(0.01-0.62)      | 0.18<br>(0.02-0.23)      |
| <b>CD8 T cells</b><br>%CD45 <sup>+</sup> cells<br>Median (range)        | 20.71<br>(1.36-43.14)    | 20.25<br>(6.48-31.47)  | 19.09<br>(1.36-43.14)   | 22.12<br>(1.71-31.69)    | 24.29<br>(13.34-35.89)   |
| <b>CD4 T cells</b><br>%CD45 <sup>+</sup> cells<br>Median (range)        | 5.91<br>(0.23-17.72)     | 8.94<br>(0.23-17.72)   | 5.19<br>(1.54-14.64)    | 9.33<br>(1.91-16.90)     | 4.32<br>(3.46-7.00)      |
| <b>B cells</b><br>%CD45 <sup>+</sup> cells<br>Median (range)            | 3.92<br>(0.26-35.02)     | 2.82<br>(0.26-7.07)    | 5.51<br>(2.57-35.02)    | 3.73<br>(0.54-33.71)     | 1.53<br>(0.26-2.64)      |
| <b>Monocytes</b><br>%CD45 <sup>+</sup> cells<br>Median (range)          | 0.50<br>(0.08-14.72)     | 1.20<br>(0.08-14.06)   | 0.48<br>(0.14-3.08)     | 0.46<br>(0.15-14.72)     | 0.33<br>(0.16-2.72)      |
| <b>cDCs</b><br>%CD45 <sup>+</sup> cells<br>Median (range)               | 0.47<br>(0.01-4.55)      | 1.57<br>(0.01-4.55)    | 0.43<br>(0.01-2.66)     | 0.36<br>(0.23-2.07)      | 0.63<br>(0.43-1.14)      |

547 **Table 2.** Immune cell subtype frequency in bronchial brushings samples from children aged  
 548 0-15 years.

549

| <b>BRONCHIAL IMMUNE CELLS</b>                                           | <b>0-15 years (n=17)</b> | <b>0-5 years (n=8)</b> | <b>6-10 years (n=5)</b> | <b>11-15 years (n=4)</b> |
|-------------------------------------------------------------------------|--------------------------|------------------------|-------------------------|--------------------------|
| <b>Total granulocytes</b><br>%CD45 <sup>+</sup> cells<br>Median (range) | 40.84<br>(1.85-89.57)    | 58.86<br>(5.04-89.57)  | 18.34<br>(1.85-56.76)   | 33.53<br>(15.00-47.55)   |
| <b>Eosinophils</b><br>%CD45 <sup>+</sup> cells<br>Median (range)        | 0.41<br>(0.01-4.41)      | 0.23<br>(0.02-1.52)    | 1.66<br>(0.12-4.04)     | 2.34<br>(0.01-4.41)      |
| <b>Neutrophils</b><br>%CD45 <sup>+</sup> cells<br>Median (range)        | 30.75<br>(1.58-85.04)    | 56.10<br>(4.6-85.04)   | 15.91<br>(1.58-52.41)   | 20.41<br>(9.88-37.80)    |
| <b>Macrophages</b><br>%CD45 <sup>+</sup> cells<br>Median (range)        | 3.46<br>(0.68-11.56)     | 1.47<br>(0.68-3.71)    | 3.53<br>(3.09-10.74)    | 9.03<br>(3.62-11.56)     |
| <b>NK cells</b><br>%CD45 <sup>+</sup> cells<br>Median (range)           | 1.46<br>(0.26-5.88)      | 1.24<br>(0.31-5.88)    | 0.98<br>(0.26-1.83)     | 2.74<br>(0.61-4.44)      |
| <b>NK-T cells</b><br>%CD45 <sup>+</sup> cells<br>Median (range)         | 0.98<br>(0.07-6.56)      | 0.33<br>(0.07-2.05)    | 1.70<br>(0.16-2.65)     | 2.60<br>(0.78-6.56)      |
| <b>CD8 T cells</b><br>%CD45 <sup>+</sup> cells<br>Median (range)        | 13.78<br>(0.86-33.92)    | 7.89<br>(1.85-21.82)   | 13.78<br>(0.86-33.92)   | 22.56<br>(8.43-27.76)    |
| <b>CD4 T cells</b><br>%CD45 <sup>+</sup> cells<br>Median (range)        | 3.35<br>(0.06-19.24)     | 3.77<br>(0.11-19.24)   | 4.23<br>(1.58-10.50)    | 6.49<br>(0.06-18.61)     |
| <b>B cells</b><br>%CD45 <sup>+</sup> cells<br>Median (range)            | 2.10<br>(0.29-12.61)     | 2.54<br>(0.5-5.35)     | 1.86<br>(0.29-12.26)    | 1.87<br>(0.67-12.61)     |
| <b>Monocytes</b><br>%CD45 <sup>+</sup> cells<br>Median (range)          | 1.27<br>(0.01-15.58)     | 1.53<br>(0.08-15.58)   | 1.59<br>(0.31-5.95)     | 0.73<br>(0.01-1.39)      |
| <b>cDCs</b><br>%CD45 <sup>+</sup> cells<br>Median (range)               | 0.70<br>(0.01-2.11)      | 0.73<br>(0.01-2.11)    | 0.70<br>(0.04-1.59)     | 0.87<br>(0.01-1.52)      |

550 **Table 3.** Immune cell subtype frequency in bronchoalveolar lavage (BAL) samples from  
 551 children aged 0-15 years.

| <b>ALVEOLAR IMMUNE CELLS</b>                                            | <b>0-15 years (n=8)</b> | <b>0-5 years (n=5)</b> | <b>6-10 years (n=3)</b> |
|-------------------------------------------------------------------------|-------------------------|------------------------|-------------------------|
| <b>Total granulocytes</b><br>%CD45 <sup>+</sup> cells<br>Median (range) | 1.88<br>(0.49-8.48)     | 1.59<br>(0.49-8.49)    | 2.16<br>(0.53-3.51)     |
| <b>Eosinophils</b><br>%CD45 <sup>+</sup> cells<br>Median (range)        | 0.06<br>(0.003-0.20)    | 0.10<br>(0.01-0.20)    | 0.03<br>(0.02-0.10)     |
| <b>Neutrophils</b><br>%CD45 <sup>+</sup> cells<br>Median (range)        | 1.82<br>(0.49-8.33)     | 1.5<br>(0.49-8.33)     | 2.13<br>(0.50-3.40)     |
| <b>Macrophages</b><br>%CD45 <sup>+</sup> cells<br>Median (range)        | 80.05<br>(58.77-87.01)  | 78.5<br>(58.77-83.60)  | 84.37<br>(73.82-87.01)  |
| <b>NK cells</b><br>%CD45 <sup>+</sup> cells<br>Median (range)           | 0.39<br>(0.10-0.90)     | 0.21<br>(0.10-0.90)    | 0.42<br>(0.35-0.43)     |
| <b>NK-T cells</b><br>%CD45 <sup>+</sup> cells<br>Median (range)         | 0.19<br>(0.02-0.63)     | 0.13<br>(0.02-0.23)    | 0.54<br>(0.32-0.63)     |
| <b>CD8 T cells</b><br>%CD45 <sup>+</sup> cells<br>Median (range)        | 3.87<br>(0.35-10.96)    | 4.11<br>(0.35-10.96)   | 3.62<br>(3.5-6.54)      |
| <b>CD4 T cells</b><br>%CD45 <sup>+</sup> cells<br>Median (range)        | 3.42<br>(0.01-8.78)     | 3.49<br>(0.01-6.45)    | 2.64<br>(2.38-8.78)     |
| <b>B cells</b><br>%CD45 <sup>+</sup> cells<br>Median (range)            | 0.97<br>(0.16-5.09)     | 1.25<br>(0.37-5.09)    | 0.69<br>(0.16-1.55)     |
| <b>Monocytes</b><br>%CD45 <sup>+</sup> cells<br>Median (range)          | 0.46<br>(0.15-2.41)     | 0.99<br>(0.15-2.41)    | 0.20<br>(0.19-0.38)     |
| <b>cDCs</b><br>%CD45 <sup>+</sup> cells<br>Median (range)               | 0.65<br>(0.10-1.61)     | 0.94<br>(0.10-1.61)    | 0.52<br>(0.37-0.78)     |

552

553

554 **Table 4.** Immune cell subtype frequency in tonsils from children aged 0-15 years.

| <b>TONSIL<br/>IMMUNE CELLS</b>                                                   | <b>0-15 years<br/>(n=31)</b> | <b>0-2 years<br/>(n=5)</b> | <b>3-5 years<br/>(n=13)</b> | <b>6-10 years<br/>(n=9)</b> | <b>11-15 years<br/>(n=4)</b> |
|----------------------------------------------------------------------------------|------------------------------|----------------------------|-----------------------------|-----------------------------|------------------------------|
| <b>Neutrophils</b><br>%CD45 <sup>+</sup> cells<br>Median (range)                 | 0.59<br>(0.05-2.36)          | 0.17<br>(0.06-1.29)        | 0.70<br>(0.05-1.52)         | 0.49<br>(0.19-1.18)         | 2.03<br>(1.34-2.36)          |
| <b>Plasma blasts</b><br>%CD45 <sup>+</sup> cells<br>Median (range)               | 1.38<br>(0.41-3.54)          | 1.53<br>(1.20-1.95)        | 1.33<br>(0.54-2.91)         | 1.60<br>(0.41-3.54)         | 1.32<br>(0.94-1.81)          |
| <b>GC B cells</b><br>%CD45 <sup>+</sup> cells<br>Median (range)                  | 18.84<br>(7.16-42.73)        | 22.69<br>(7.16-42.73)      | 18.47<br>(9.64-30.00)       | 19.01<br>(9.31-27.40)       | 9.59<br>(7.25-24.30)         |
| <b>Atypical memory B cells</b><br>%CD45 <sup>+</sup> cells<br>Median (range)     | 3.62<br>(1.44-8.64)          | 2.19<br>(1.78-2.98)        | 4.42<br>(2.47-7.01)         | 3.62<br>(1.82-4.50)         | 2.79<br>(1.44-8..64)         |
| <b>Classical memory B cells</b><br>%CD45 <sup>+</sup> cells<br>Median (range)    | 1.63<br>(0.45-3.72)          | 0.53<br>(0.45-1.60)        | 1.80<br>(0.79-2.59)         | 1.47<br>(0.77-3.72)         | 2.77<br>(1.56-3.39)          |
| <b>Naïve B cells</b><br>%CD45 <sup>+</sup> cells<br>Median (range)               | 16.45<br>(4.44-36.15)        | 14.39<br>(9.73-29.40)      | 15.07<br>(9.93-19.94)       | 16.53<br>(4.44-29.87)       | 18.44<br>(17.06-36.15)       |
| <b>Non-switched memory B cells</b><br>%CD45 <sup>+</sup> cells<br>Median (range) | 1.69<br>(0.61-7.88)          | 1.29<br>(0.74-1.92)        | 1.77<br>(0.87-3.99)         | 1.69<br>(0.61-7.88)         | 2.51<br>(1.30-2.77)          |
| <b>Plasma cells</b><br>%CD45 <sup>+</sup> cells<br>Median (range)                | 0.40<br>(0.02-1.96)          | 0.16<br>(0.03-1.31)        | 0.40<br>(0.04-1.96)         | 0.45<br>(0.15-0.64)         | 0.10<br>(0.02-0.70)          |
| <b>Transitional B cells</b><br>%CD45 <sup>+</sup> cells<br>Median (range)        | 10.27<br>(4.06-17.21)        | 14.81<br>(6.50-17.21)      | 11.33<br>(7.36-14.24)       | 8.76<br>(4.06-13.25)        | 5.90<br>(5.04-10.02)         |
| <b>NK cells</b><br>%CD45 <sup>+</sup> cells<br>Median (range)                    | 0.37<br>(0.08-1.09)          | 0.37<br>(0.22-0.80)        | 0.37<br>(0.1-1.09)          | 0.37<br>(0.08-0.59)         | 0.37<br>(0.24-0.50)          |
| <b>NK-T cells</b><br>%CD45 <sup>+</sup> cells<br>Median (range)                  | 0.09<br>(0.02-0.21)          | 0.07<br>(0.02-0.21)        | 0.09<br>(0.04-0.20)         | 0.11<br>(0.03-0.18)         | 0.05<br>(0.04-0.12)          |
| <b>CD8 TCM</b><br>%CD45 <sup>+</sup> cells<br>Median (range)                     | 1.35<br>(0.2-4.34)           | 0.41<br>(0.20-1.38)        | 1.11<br>(0.33-4.34)         | 1.35<br>(0.46-3.11)         | 2.38<br>(1.94-2.81)          |
| <b>CD8 TN</b><br>%CD45 <sup>+</sup> cells<br>Median (range)                      | 2.79<br>(0.94-9.54)          | 2.83<br>(1.6-9.54)         | 3.21<br>(1.51-7.71)         | 2.97<br>(1.43-8.29)         | 1.73<br>(0.94-2.79)          |
| <b>CD8 TEMRA</b><br>%CD45 <sup>+</sup> cells<br>Median (range)                   | 0.23<br>(0.12-3.04)          | 0.22<br>(0.17-0.38)        | 0.26<br>(0.14-0.93)         | 0.20<br>(0.36-2.17)         | 0.19<br>(0.12-0.41)          |
| <b>CD8 TEM</b><br>%CD45 <sup>+</sup> cells<br>Median (range)                     | 0.52<br>(0.13-3.01)          | 0.23<br>(0.14-0.33)        | 0.64<br>(0.13-2.13)         | 0.53<br>(0.36-2.17)         | 1.66<br>(0.52-3.01)          |
| <b>Activated Tregs</b><br>%CD45 <sup>+</sup> cells<br>Median (range)             | 0.55<br>(0.19-1.47)          | 0.41<br>(0.19-1.25)        | 0.54<br>(0.20-1.47)         | 0.57<br>(0.32-0.95)         | 0.35<br>(0.31-0.57)          |



|                                                                        |                      |                      |                      |                       |                        |
|------------------------------------------------------------------------|----------------------|----------------------|----------------------|-----------------------|------------------------|
| <b>Naive Tregs</b><br>%CD45 <sup>+</sup> cells<br>Median (range)       | 2.46<br>(1.13-5.75)  | 2.76<br>(1.95-3.10)  | 2.46<br>(1.56-5.75)  | 2.14<br>(1.43-4.78)   | 3.01<br>(1.13-3.62)    |
| <b>TFH cells</b><br>%CD45 <sup>+</sup> cells<br>Median (range)         | 8.57<br>(4.59-17.84) | 8.49<br>(6.88-12.10) | 8.87<br>(4.66-11.77) | 8.56<br>(4.63-12.12)  | 7.20<br>(4.59-17.84)   |
| <b>CD4 Thelper cells</b><br>%CD45 <sup>+</sup> cells<br>Median (range) | 9.19<br>(3.93-19.32) | 7.60<br>(3.93-8.83)  | 8.78<br>(7.16-14.70) | 12.10<br>(7.25-15.06) | 13.75<br>(11.69-19.32) |
| <b>CD4 TN</b><br>%CD45 <sup>+</sup> cells<br>Median (range)            | 6.07<br>(1.61-13.14) | 5.65<br>(3.32-12.31) | 6.07<br>(2.60-10.50) | 6.65<br>(3.34-13.14)  | 4.35<br>(1.61-6.59)    |
| <b>CD4 TEMRA</b><br>%CD45 <sup>+</sup> cells<br>Median (range)         | 0.39<br>(0.11-2.15)  | 0.32<br>(0.21-0.89)  | 0.44<br>(0.17-1.59)  | 0.35<br>(0.19-2.15)   | 0.79<br>(0.11-1.28)    |
| <b>Monocytes</b><br>%CD45 <sup>+</sup> cells<br>Median (range)         | 0.40<br>(0.13-1.13)  | 0.22<br>(0.13-0.63)  | 0.47<br>(0.26-1.13)  | 0.28<br>(0.20-0.60)   | 0.41<br>(0.28-0.51)    |
| <b>cDCs</b><br>%CD45 <sup>+</sup> cells<br>Median (range)              | 0.17<br>(0.04-0.41)  | 0.16<br>(0.12-0.22)  | 0.16<br>(0.10-0.35)  | 0.18<br>(0.04-0.41)   | 0.17<br>(0.12-0.39)    |
| <b>pDCs</b><br>%CD45 <sup>+</sup> cells<br>Median (range)              | 0.32<br>(0.04-0.89)  | 0.26<br>(0.10-0.35)  | 0.35<br>(0.19-0.89)  | 0.28<br>(0.04-0.54)   | 0.15<br>(0.09-0.30)    |
| <b>ILCs</b><br>%CD45 <sup>+</sup> cells<br>Median (range)              | 0.32<br>(0.05-0.96)  | 0.39<br>(0.10-0.48)  | 0.48<br>(0.08-0.96)  | 0.31<br>(0.05-0.81)   | 0.45<br>(0.27-0.60)    |

555

556 **Table 5.** Immune cell subtype frequency in adenoids from children aged 0-15 years.

| <b>ADENOID<br/>IMMUNE CELLS</b>                                                  | <b>0-15 years<br/>(n=36)</b> | <b>0-2 years<br/>(n=4)</b> | <b>3-5 years<br/>(n=14)</b> | <b>6-10 years<br/>(n=10)</b> | <b>11-15 years<br/>(n=8)</b> |
|----------------------------------------------------------------------------------|------------------------------|----------------------------|-----------------------------|------------------------------|------------------------------|
| <b>Neutrophils</b><br>%CD45 <sup>+</sup> cells<br>Median (range)                 | 0.27<br>(0.07-3.47)          | 0.48<br>(0.21-0.88)        | 0.29<br>(0.11-2.83)         | 0.26<br>(0.08-0.40)          | 0.11<br>(0.07-3.47)          |
| <b>Plasma blasts</b><br>%CD45 <sup>+</sup> cells<br>Median (range)               | 0.89<br>(0.31-1.66)          | 0.83<br>(0.55-1.30)        | 1.02<br>(0.44-1.52)         | 0.68<br>(0.31-1.46)          | 0.90<br>(0.33-1.66)          |
| <b>GC B cells</b><br>%CD45 <sup>+</sup> cells<br>Median (range)                  | 10.38<br>(1.76-32.58)        | 11.33<br>(8.88-16.06)      | 14.27<br>(9.15-32.58)       | 9.41<br>(4.31-21.51)         | 6.49<br>(1.76-19.93)         |
| <b>Atypical memory B cells</b><br>%CD45 <sup>+</sup> cells<br>Median (range)     | 3.85<br>(1.08-9.17)          | 2.27<br>(1.73-4.15)        | 4.59<br>(2.77-7.08)         | 3.51<br>(2.46-6.92)          | 3.87<br>(1.08-9.17)          |
| <b>Classical memory B cells</b><br>%CD45 <sup>+</sup> cells<br>Median (range)    | 2.80<br>(0.66-8.91)          | 0.98<br>(0.66-1.32)        | 2.88<br>(1.37-5.88)         | 3.25<br>(1.82-7.87)          | 3.14<br>(1.74-8.91)          |
| <b>Naïve B cells</b><br>%CD45 <sup>+</sup> cells<br>Median (range)               | 18.63<br>(8.30-43.75)        | 22.71<br>(11.05-27.67)     | 17.48<br>(11.78-36.03)      | 17.32<br>(8.30-26.74)        | 17.89<br>(11.17-43.75)       |
| <b>Non-switched memory B cells</b><br>%CD45 <sup>+</sup> cells<br>Median (range) | 2.72<br>(0.89-6.63)          | 1.51<br>(0.89-2.17)        | 2.23<br>(1.37-2.86)         | 3.94<br>(1.14-6.63)          | 4.29<br>(2.53-5.64)          |
| <b>Plasma cells</b><br>%CD45 <sup>+</sup> cells<br>Median (range)                | 0.20<br>(0.03-0.77)          | 0.14<br>(0.12-0.25)        | 0.25<br>(0.03-0.77)         | 0.16<br>(0.04-0.63)          | 0.20<br>(0.10-0.57)          |
| <b>Transitional B cells</b><br>%CD45 <sup>+</sup> cells<br>Median (range)        | 9.48<br>(3.25-24.75)         | 14.51<br>(11.22-24.75)     | 10.92<br>(3.25-12.71)       | 8.06<br>(5.08-13.53)         | 6.28<br>(3.52-16.21)         |
| <b>NK cells</b><br>%CD45 <sup>+</sup> cells<br>Median (range)                    | 0.63<br>(0.25-1.58)          | 0.57<br>(0.42-1.58)        | 0.77<br>(0.38-1.26)         | 0.63<br>(0.25-1.34)          | 0.64<br>(0.35-1.24)          |
| <b>NK-T cells</b><br>%CD45 <sup>+</sup> cells<br>Median (range)                  | 0.09<br>(0.02-0.52)          | 0.06<br>(0.03-0.07)        | 0.08<br>(0.02-0.52)         | 0.11<br>(0.05-0.19)          | 0.14<br>(0.08-0.23)          |
| <b>CD8 TCM</b><br>%CD45 <sup>+</sup> cells<br>Median (range)                     | 0.92<br>(0.22-3.38)          | 0.46<br>(0.31-0.60)        | 0.92<br>(0.23-3.10)         | 1.14<br>(0.22-3.14)          | 1.90<br>(0.50-3.38)          |
| <b>CD8 TN</b><br>%CD45 <sup>+</sup> cells<br>Median (range)                      | 3.37<br>(0.62-9.69)          | 5.19<br>(3.23-8.21)        | 2.65<br>(1.75-7.42)         | 3.32<br>(1.53-5.90)          | 3.75<br>(0.62-9.69)          |
| <b>CD8 TEMRA</b><br>%CD45 <sup>+</sup> cells<br>Median (range)                   | 0.36<br>(0.11-2.34)          | 0.47<br>(0.2-1.12)         | 0.33<br>(0.14-0.79)         | 0.48<br>(0.20-1.57)          | 0.20<br>(0.11-2.34)          |
| <b>CD8 TEM</b><br>%CD45 <sup>+</sup> cells<br>Median (range)                     | 0.83<br>(0.17-3.13)          | 0.38<br>(0.17-0.84)        | 0.58<br>(0.27-1.62)         | 0.92<br>(0.39-2.88)          | 1.14<br>(0.65-3.13)          |
| <b>Activated Tregs</b><br>%CD45 <sup>+</sup> cells<br>Median (range)             | 0.56<br>(0.13-1.74)          | 0.50<br>(0.27-0.71)        | 0.49<br>(0.20-1.13)         | 0.62<br>(0.22-1.74)          | 0.57<br>(0.13-1.10)          |

|                                                                        |                       |                       |                       |                       |                       |
|------------------------------------------------------------------------|-----------------------|-----------------------|-----------------------|-----------------------|-----------------------|
| <b>Naive Tregs</b><br>%CD45 <sup>+</sup> cells<br>Median (range)       | 2.62<br>(0.91-7.12)   | 2.24<br>(1.31-3.11)   | 2.73<br>(1.37-5.33)   | 3.21<br>(1.31-7.12)   | 2.60<br>(0.91-3.45)   |
| <b>TFH cells</b><br>%CD45 <sup>+</sup> cells<br>Median (range)         | 9.84<br>(0.50-17.32)  | 10.95<br>(8.32-17.32) | 10.74<br>(4.59-14.71) | 9.80<br>(4.64-13.24)  | 7.34<br>(0.50-14.33)  |
| <b>CD4 Thelper cells</b><br>%CD45 <sup>+</sup> cells<br>Median (range) | 11.90<br>(1.90-26.26) | 6.51<br>(4.96-9.12)   | 8.81<br>(1.90-13.39)  | 15.18<br>(7.94-19.69) | 16.78<br>(6.37-26.26) |
| <b>CD4 TN</b><br>%CD45 <sup>+</sup> cells<br>Median (range)            | 5.58<br>(0.86-16.73)  | 6.83<br>(5.06-12.27)  | 4.69<br>(3.19-8.66)   | 6.41<br>(3.66-9.59)   | 5.57<br>(0.86-16.73)  |
| <b>CD4 TEMRA</b><br>%CD45 <sup>+</sup> cells<br>Median (range)         | 0.46<br>(0.07-1.20)   | 0.48<br>(0.23-0.75)   | 0.51<br>(0.23-1.06)   | 0.44<br>(0.21-1.20)   | 0.56<br>(0.07-0.94)   |
| <b>Monocytes</b><br>%CD45 <sup>+</sup> cells<br>Median (range)         | 0.36<br>(0.14-1.08)   | 0.45<br>(0.21-0.58)   | 0.46<br>(0.21-0.86)   | 0.34<br>(0.16-1.08)   | 0.34<br>(0.14-0.99)   |
| <b>cDCs</b><br>%CD45 <sup>+</sup> cells<br>Median (range)              | 0.23<br>(0.09-0.87)   | 0.19<br>(0.17-0.25)   | 0.21<br>(0.09-0.87)   | 0.26<br>(0.12-0.58)   | 0.24<br>(0.14-0.50)   |
| <b>pDCs</b><br>%CD45 <sup>+</sup> cells<br>Median (range)              | 0.83<br>(0.13-2.98)   | 0.51<br>(0.42-1.59)   | 0.98<br>(0.29-2.07)   | 0.68<br>(0.35-1.64)   | 1.04<br>(0.13-2.98)   |
| <b>ILCs</b><br>%CD45 <sup>+</sup> cells<br>Median (range)              | 0.34<br>(0.01-1.24)   | 0.32<br>(0.26-0.38)   | 0.33<br>(0.10-1.24)   | 0.44<br>(0.07-0.64)   | 0.33<br>(0.01-0.85)   |

557

558 **Table 6.** Immune cell subtype frequency in whole blood samples from children aged 0-15  
559 years.

| <b>WHOLE BLOOD IMMUNE CELLS</b>                                                  | <b>0-15 years (n=49)</b> | <b>0-2 years (n=6)</b> | <b>3-5 years (n=17)</b> | <b>6-10 years (n=15)</b> | <b>11-15 years (n=11)</b> |
|----------------------------------------------------------------------------------|--------------------------|------------------------|-------------------------|--------------------------|---------------------------|
| <b>Eosinophils</b><br>%CD45 <sup>+</sup> cells<br>Median (range)                 | 0.83<br>(0.04-11.98)     | 0.79<br>(0.29-2.28)    | 0.60<br>(0.04-6.55)     | 1.53<br>(0.17-11.98)     | 1.52<br>(0.13-5.95)       |
| <b>Neutrophils</b><br>%CD45 <sup>+</sup> cells<br>Median (range)                 | 27.50<br>(9.53-77.72)    | 25.52<br>(13.34-75.76) | 21.80<br>(9.53-34.50)   | 30.68<br>(14.75-77.72)   | 38.39<br>(26.66-54.78)    |
| <b>Plasma blasts</b><br>%CD45 <sup>+</sup> cells<br>Median (range)               | 0.14<br>(0.01-0.68)      | 0.23<br>(0.04-0.58)    | 0.18<br>(0.09-0.68)     | 0.07<br>(0.01-0.47)      | 0.06<br>(0.02-0.37)       |
| <b>Atypical memory B cells</b><br>%CD45 <sup>+</sup> cells<br>Median (range)     | 0.56<br>(0.17-1.71)      | 0.34<br>(0.29-0.40)    | 0.61<br>(0.40-1.33)     | 0.55<br>(0.17-1.51)      | 0.47<br>(0.22-1.71)       |
| <b>Classical memory B cells</b><br>%CD45 <sup>+</sup> cells<br>Median (range)    | 0.52<br>(0.11-1.96)      | 0.25<br>(0.11-0.32)    | 0.74<br>(0.19-1.69)     | 0.55<br>(0.14-1.96)      | 0.45<br>(0.23-1.09)       |
| <b>Naïve B cells</b><br>%CD45 <sup>+</sup> cells<br>Median (range)               | 6.74<br>(1.16-13.06)     | 7.18<br>(1.27-11.92)   | 7.32<br>(4.60-13.06)    | 5.73<br>(1.16-8.42)      | 6.12<br>(3.78-10.77)      |
| <b>Non-switched memory B cells</b><br>%CD45 <sup>+</sup> cells<br>Median (range) | 0.78<br>(0.19-2.68)      | 0.59<br>(0.19-0.88)    | 0.92<br>(0.21-2.68)     | 0.76<br>(0.32-1.60)      | 0.57<br>(0.19-1.44)       |
| <b>Plasma cells</b><br>%CD45 <sup>+</sup> cells<br>Median (range)                | 0.09<br>(0.01-1.79)      | 0.11<br>(0.03-0.35)    | 0.17<br>(0.04-0.63)     | 0.08<br>(0.01-1.79)      | 0.07<br>(0.01-0.80)       |
| <b>Transitional B cells</b><br>%CD45 <sup>+</sup> cells<br>Median (range)        | 1.53<br>(0.19-6.68)      | 2.43<br>(0.70-6.68)    | 2.06<br>(0.63-5.49)     | 0.96<br>(0.19-2.53)      | 1.09<br>(0.50-2.07)       |
| <b>CD16-CD56bright NK cells</b><br>%CD45 <sup>+</sup> cells<br>Median (range)    | 0.31<br>(0.01-1.04)      | 0.43<br>(0.06-0.84)    | 0.31<br>(0.03-0.92)     | 0.33<br>(0.01-1.04)      | 0.19<br>(0.01-0.47)       |
| <b>CD16+CD56bright NK cells</b><br>%CD45 <sup>+</sup> cells<br>Median (range)    | 0.10<br>(0.01-0.38)      | 0.07<br>(0.04-0.38)    | 0.15<br>(0.01-0.41)     | 0.07<br>(0.01-0.25)      | 0.08<br>(0.01-0.37)       |
| <b>CD16+CD56+ NK cells</b><br>%CD45 <sup>+</sup> cells<br>Median (range)         | 5.29<br>(0.01-18.38)     | 5.20<br>(0.21-9.10)    | 5.52<br>(0.01-13.72)    | 5.48<br>(1.72-12.74)     | 3.19<br>(0.01-18.38)      |
| <b>CD16-CD56+ NK cells</b><br>%CD45 <sup>+</sup> cells<br>Median (range)         | 0.36<br>(0.07-1.90)      | 0.38<br>(0.07-0.70)    | 0.36<br>(0.20-1.40)     | 0.36<br>(0.09-1.90)      | 0.35<br>(0.15-1.17)       |
| <b>NK-T cells</b><br>%CD45 <sup>+</sup> cells<br>Median (range)                  | 1.08<br>(0.19-3.22)      | 0.27<br>(0.20-0.32)    | 1.11<br>(0.40-2.98)     | 0.80<br>(0.19-2.86)      | 1.47<br>(0.37-3.22)       |
| <b>CD8 TCM</b><br>%CD45 <sup>+</sup> cells<br>Median (range)                     | 0.81<br>(0.01-6.44)      | 0.65<br>(0.01-1.06)    | 0.82<br>(0.21-6.44)     | 1.05<br>(0.17-3.30)      | 0.81<br>(0.43-2.34)       |

|                                                                              |                       |                       |                       |                       |                      |
|------------------------------------------------------------------------------|-----------------------|-----------------------|-----------------------|-----------------------|----------------------|
| <b>CD8 TN</b><br>%CD45 <sup>+</sup> cells<br>Median (range)                  | 7.31<br>(0.04-19.47)  | 10.05<br>(0.04-13.60) | 8.89<br>(3.38-19.47)  | 8.06<br>(1.36-13.11)  | 6.49<br>(1.97-9.57)  |
| <b>CD8 TEMRA</b><br>%CD45 <sup>+</sup> cells<br>Median (range)               | 1.45<br>(0.01-5.85)   | 0.61<br>(0.01-3.70)   | 2.56<br>(0.63-5.85)   | 1.30<br>(0.30-2.40)   | 1.39<br>(0.42-2.90)  |
| <b>CD8 TEM</b><br>%CD45 <sup>+</sup> cells<br>Median (range)                 | 1.96<br>(0.02-26.52)  | 0.89<br>(0.01-2.15)   | 1.95<br>(0.40-26.52)  | 1.90<br>(0.23-4.35)   | 2.73<br>(1.06-5.01)  |
| <b>Activated Tregs</b><br>%CD45 <sup>+</sup> cells<br>Median (range)         | 1.06<br>(0.01-2.81)   | 1.47<br>(0.03-1.98)   | 1.38<br>(0.72-2.59)   | 1.05<br>(0.01-2.81)   | 0.77<br>(0.38-1.49)  |
| <b>Naive Tregs</b><br>%CD45 <sup>+</sup> cells<br>Median (range)             | 0.99<br>(0.02-3.73)   | 0.93<br>(0.02-1.45)   | 0.94<br>(0.34-1.54)   | 1.14<br>(0.12-3.73)   | 0.86<br>(0.44-2.36)  |
| <b>TFH cells</b><br>%CD45 <sup>+</sup> cells<br>Median (range)               | 1.53<br>(0.03-9.72)   | 1.37<br>(0.03-2.0)    | 1.76<br>(0.31-9.72)   | 1.21<br>(0.35-2.49)   | 1.50<br>(0.96-6.41)  |
| <b>CD4 Thelper cells</b><br>%CD45 <sup>+</sup> cells<br>Median (range)       | 4.51<br>(0.16-10.78)  | 3.66<br>(0.16-5.59)   | 3.82<br>(1.40-9.30)   | 4.96<br>(0.47-9.38)   | 6.28<br>(2.22-10.78) |
| <b>CD4 TN</b><br>%CD45 <sup>+</sup> cells<br>Median (range)                  | 13.82<br>(0.27-31.01) | 18.83<br>(0.35-31.01) | 16.47<br>(7.15-26.00) | 13.25<br>(0.27-22.06) | 9.56<br>(5.70-24.11) |
| <b>CD4 TEMRA</b><br>%CD45 <sup>+</sup> cells<br>Median (range)               | 0.41<br>(0.01-1.44)   | 0.37<br>(0.01-0.61)   | 0.52<br>(0.09-1.44)   | 0.30<br>(0.02-1.19)   | 0.41<br>(0.04-0.70)  |
| <b>cDCs</b><br>%CD45 <sup>+</sup> cells<br>Median (range)                    | 0.14<br>(0.02-0.66)   | 0.19<br>(0.04-0.49)   | 0.17<br>(0.04-0.66)   | 0.13<br>(0.02-0.40)   | 0.07<br>(0.02-0.21)  |
| <b>pDCs</b><br>%CD45 <sup>+</sup> cells<br>Median (range)                    | 0.09<br>(0.01-0.29)   | 0.13<br>(0.06-0.22)   | 0.10<br>(0.03-0.22)   | 0.07<br>(0.01-0.29)   | 0.05<br>(0.02-0.20)  |
| <b>Non-classical monocytes</b><br>%CD45 <sup>+</sup> cells<br>Median (range) | 0.22<br>(0.01-2.01)   | 0.23<br>(0.10-2.01)   | 0.27<br>(0.01-1.56)   | 0.22<br>(0.03-0.73)   | 0.11<br>(0.01-0.66)  |
| <b>Intermediate monocytes</b><br>%CD45 <sup>+</sup> cells<br>Median (range)  | 0.18<br>(0.01-2.99)   | 0.43<br>(0.14-2.99)   | 0.21<br>(0.01-1.61)   | 0.12<br>(0.03-0.36)   | 0.13<br>(0.01-0.95)  |
| <b>Classical monocytes</b><br>%CD45 <sup>+</sup> cells<br>Median (range)     | 1.85<br>(0.44-10.80)  | 3.04<br>(0.92-10.80)  | 1.68<br>(0.44-4.64)   | 1.72<br>(0.74-2.98)   | 1.90<br>(0.87-4.00)  |
| <b>ILCs</b><br>%CD45 <sup>+</sup> cells<br>Median (range)                    | 0.83<br>(0.04-2.40)   | 0.69<br>(0.04-1.35)   | 0.94<br>(0.36-1.67)   | 1.09<br>(0.24-2.40)   | 0.71<br>(0.26-1.90)  |

560

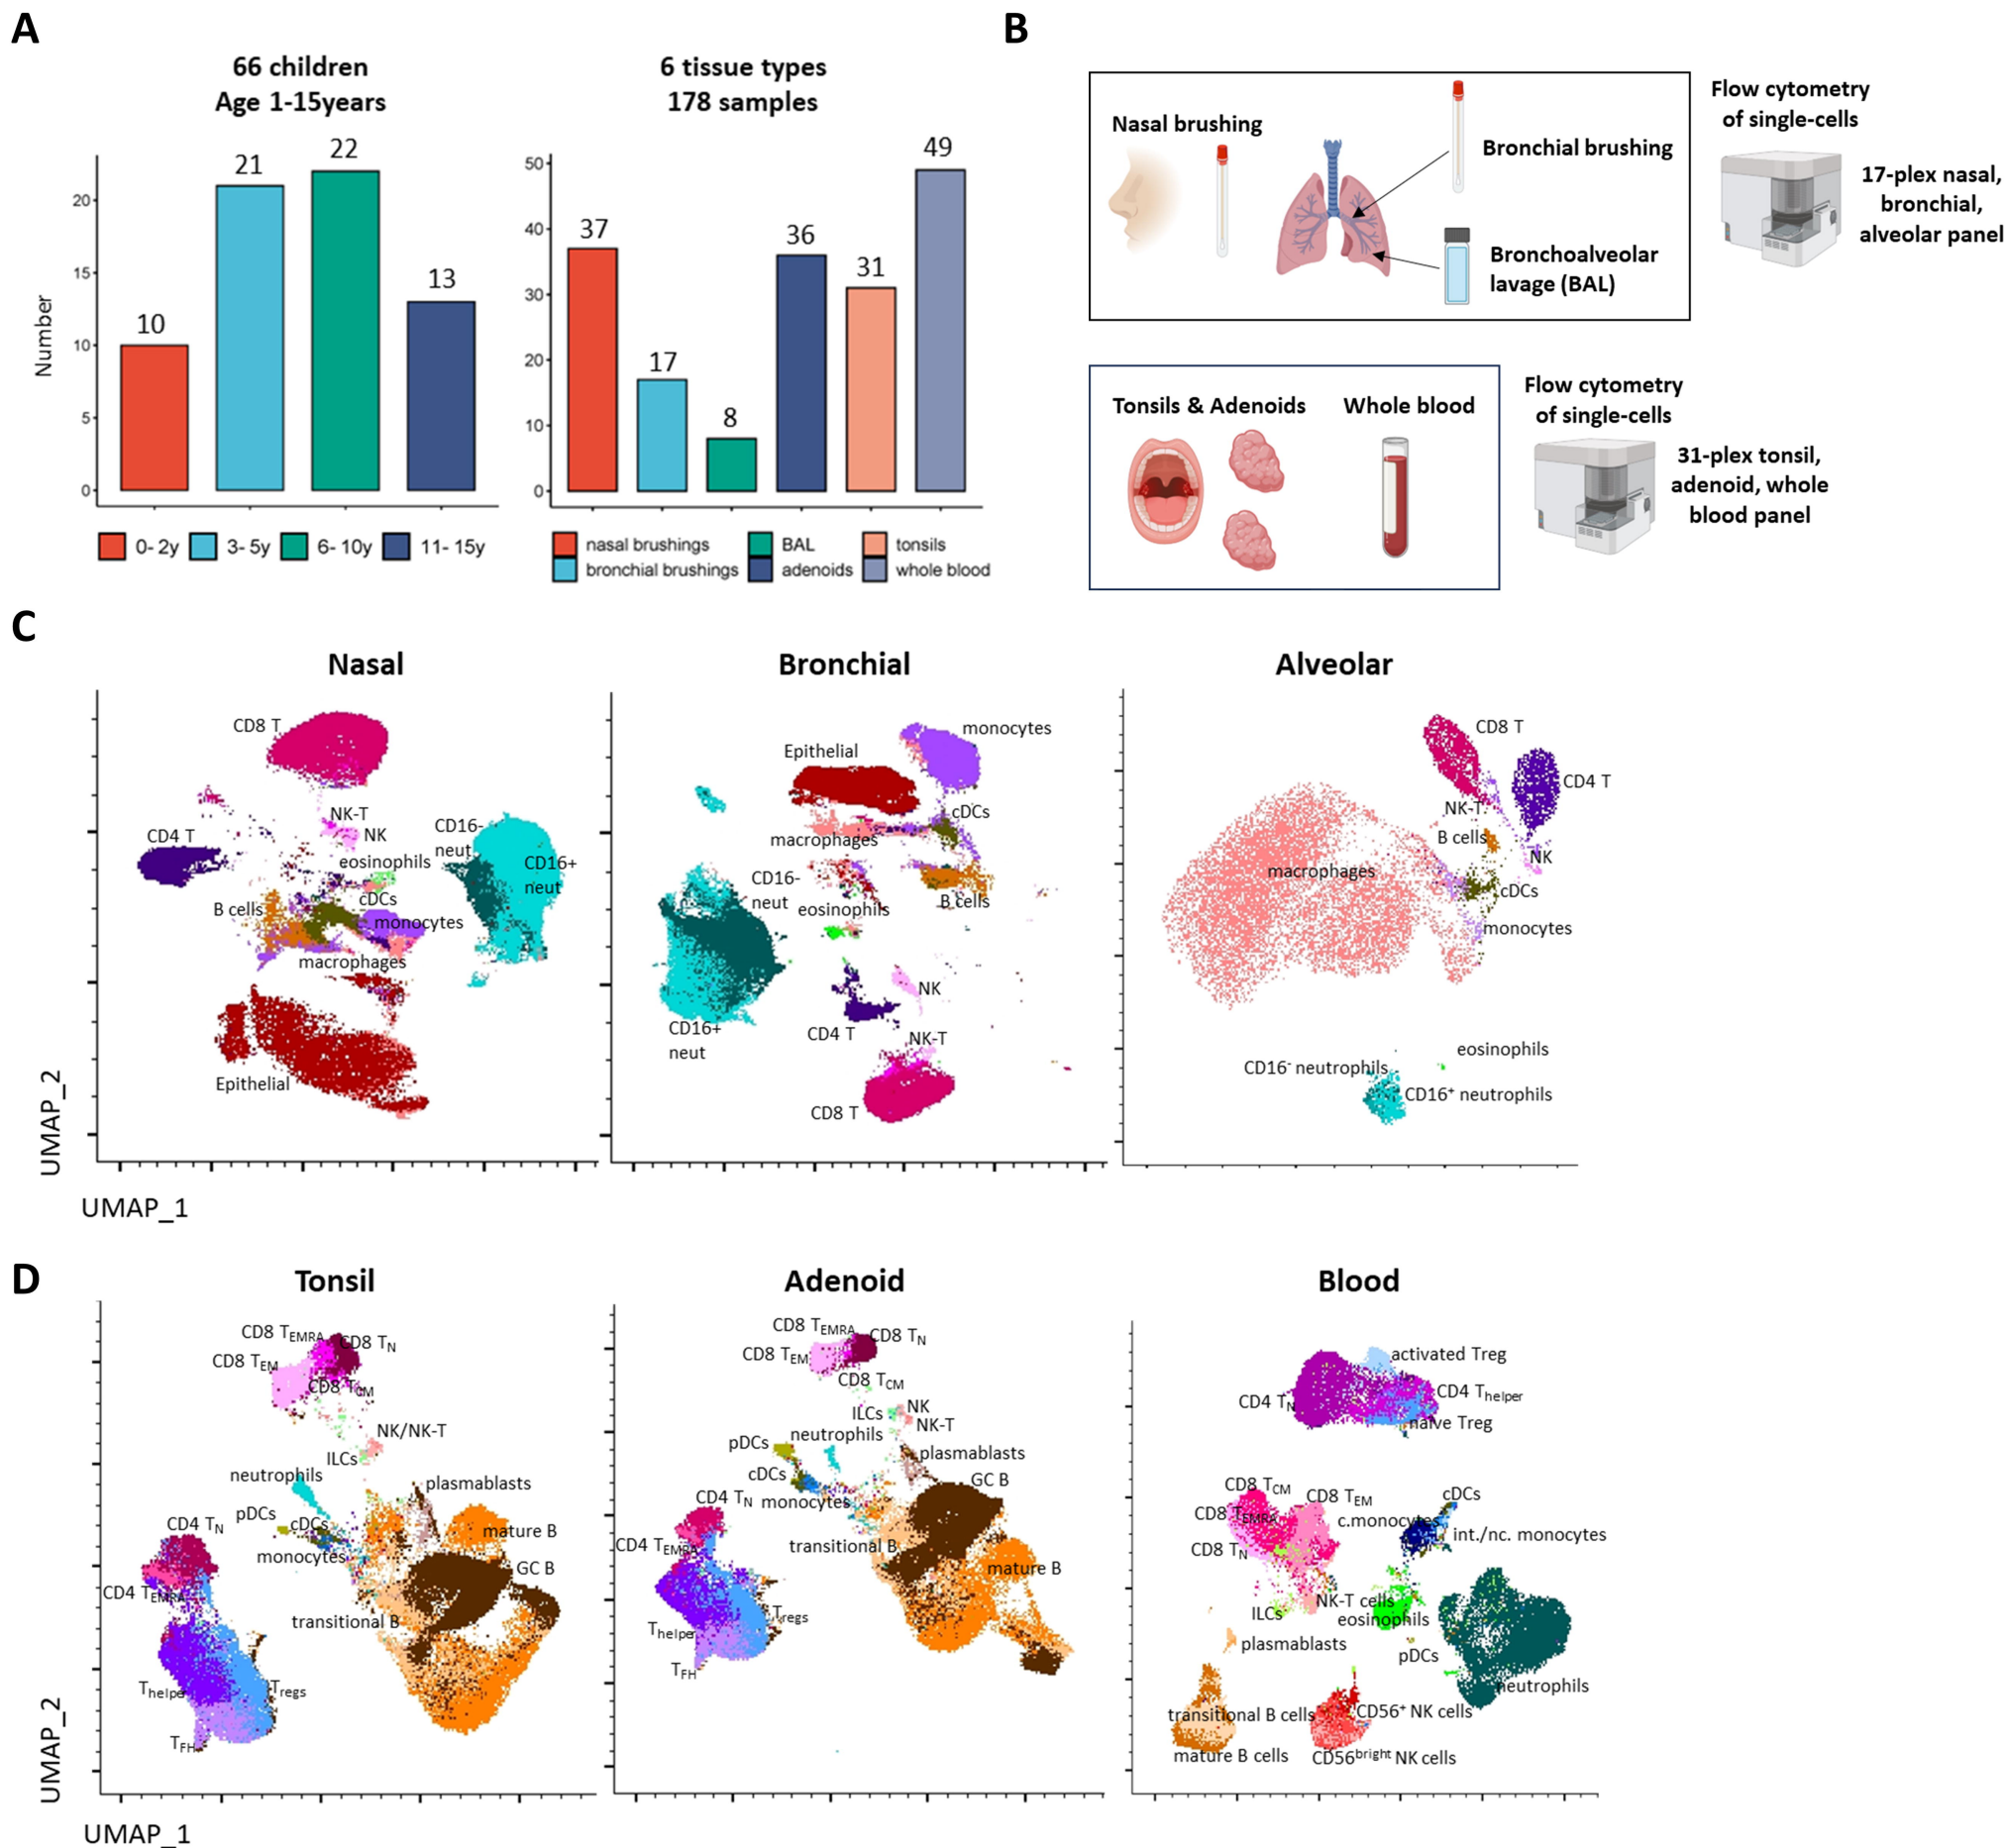

**Figure 1**



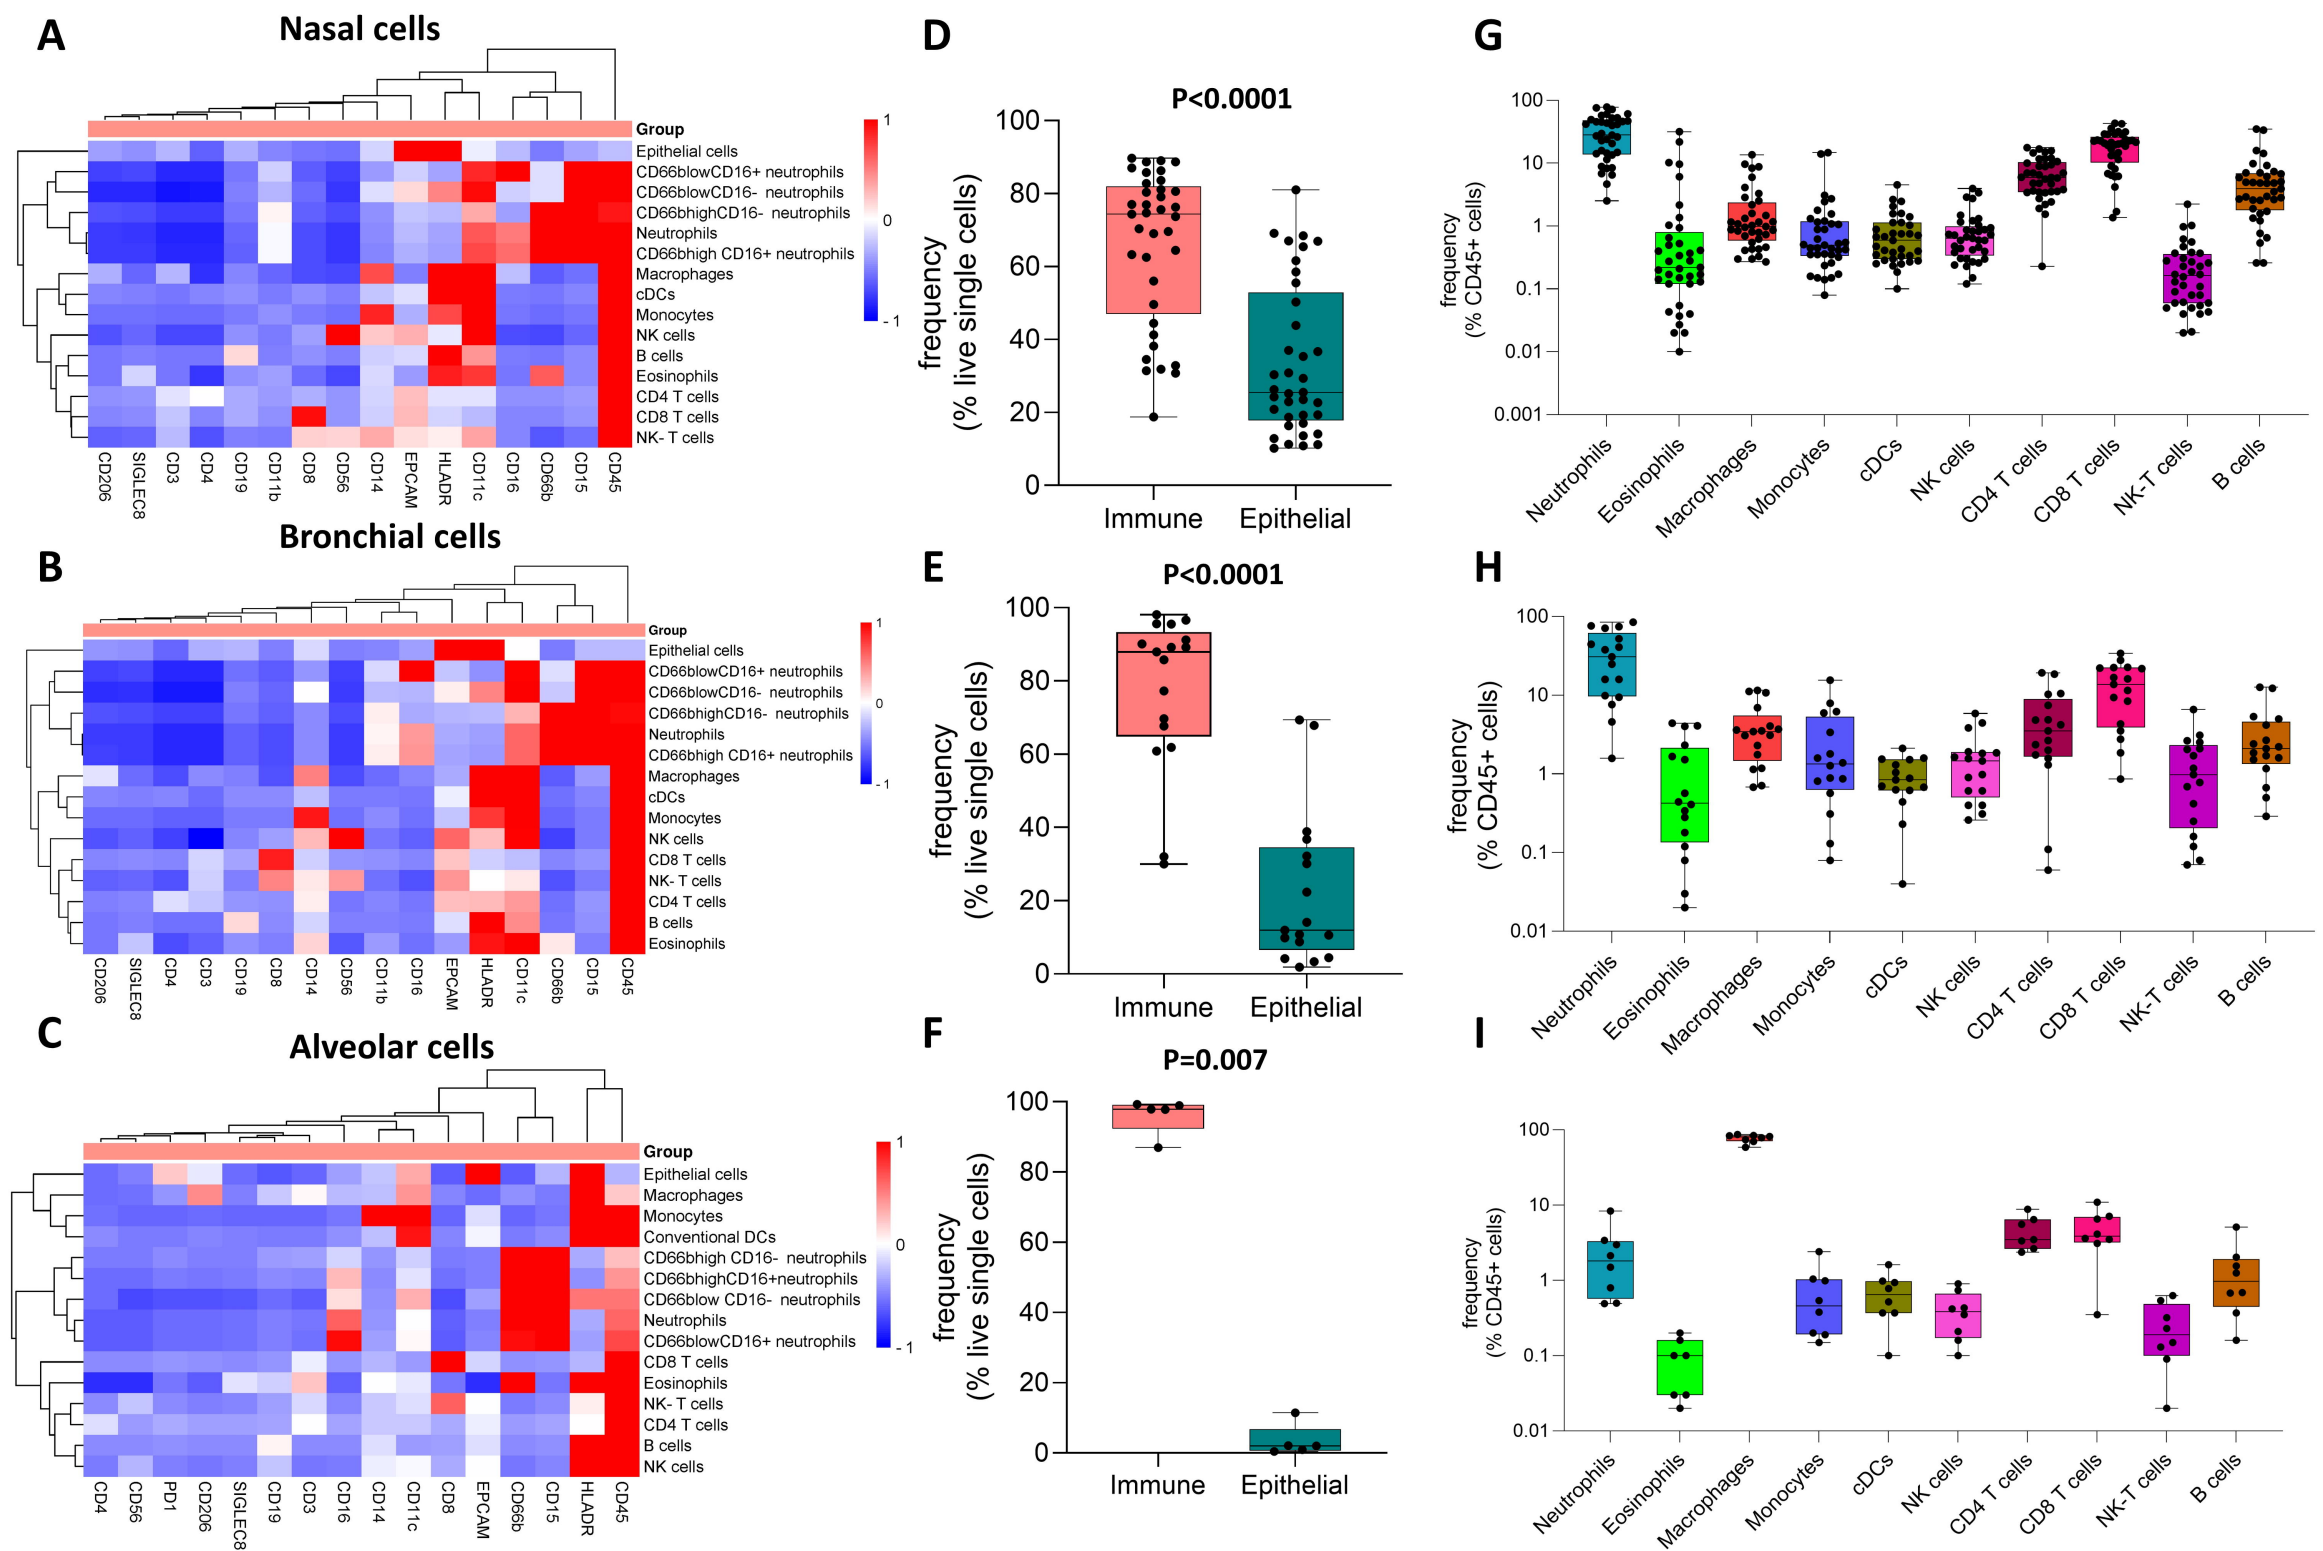

**Figure 2**



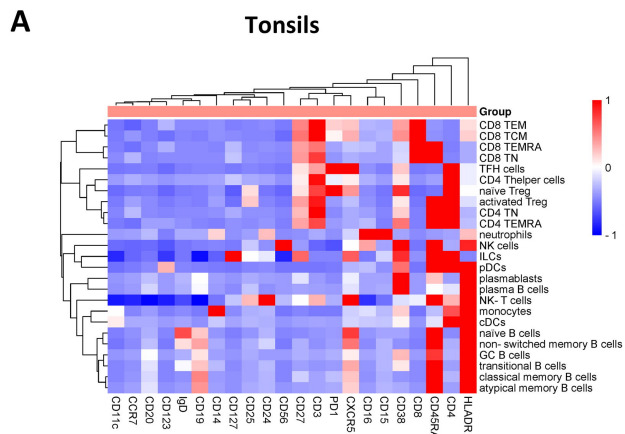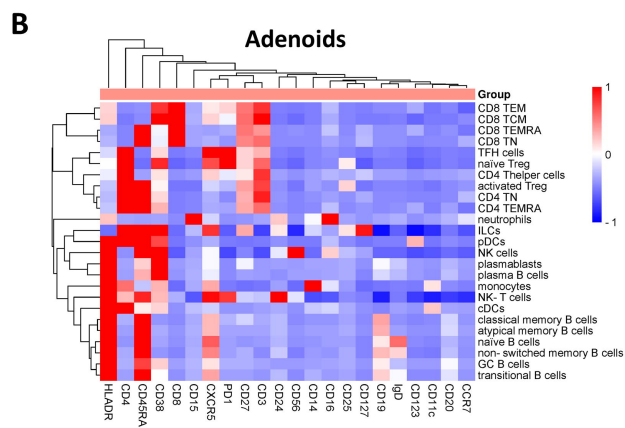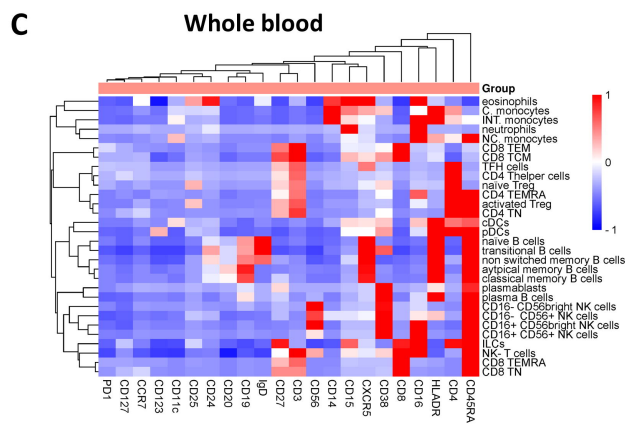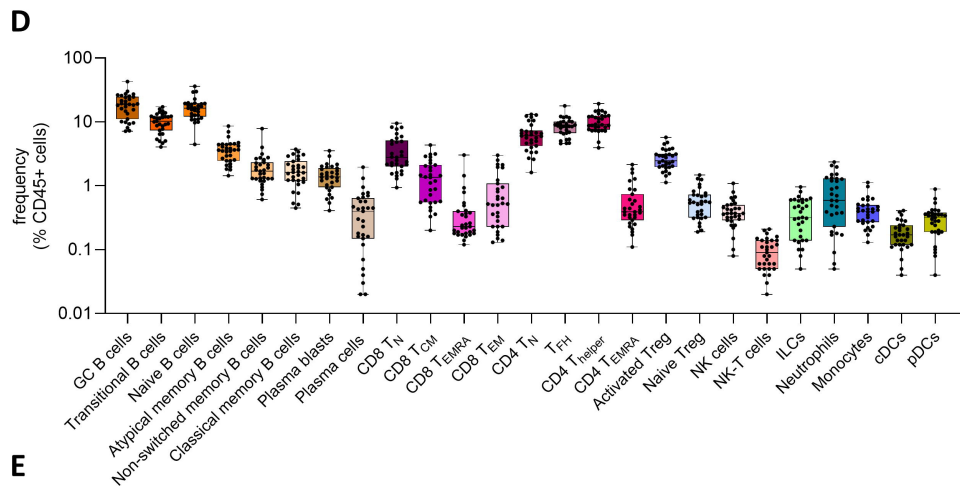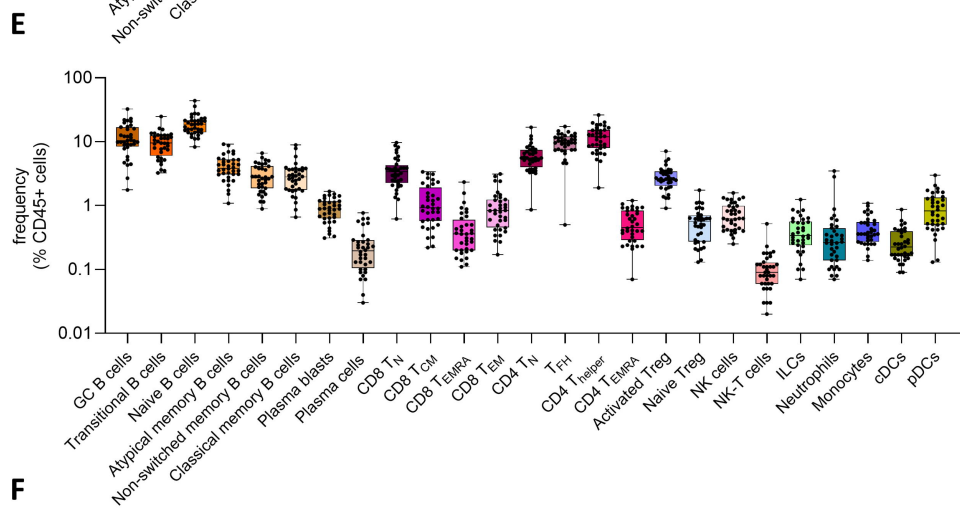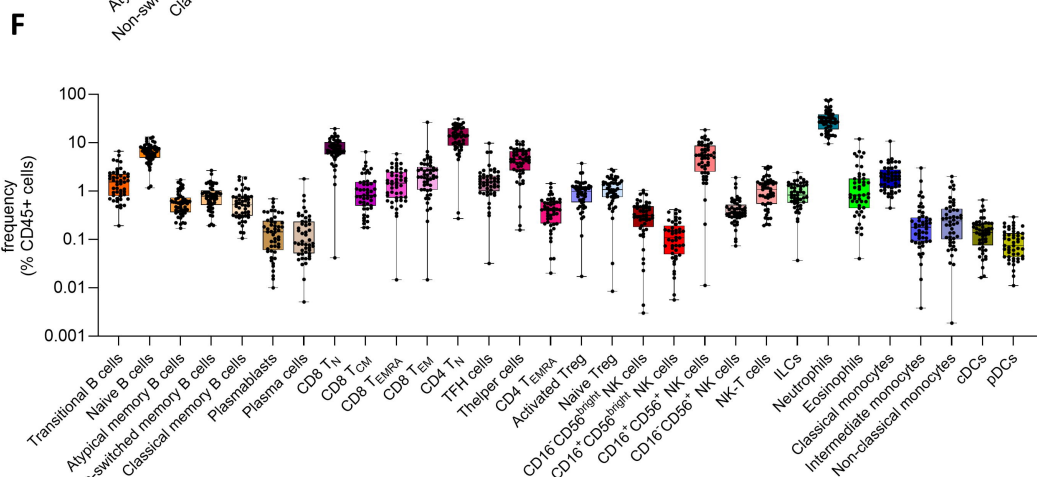

**Figure 3**

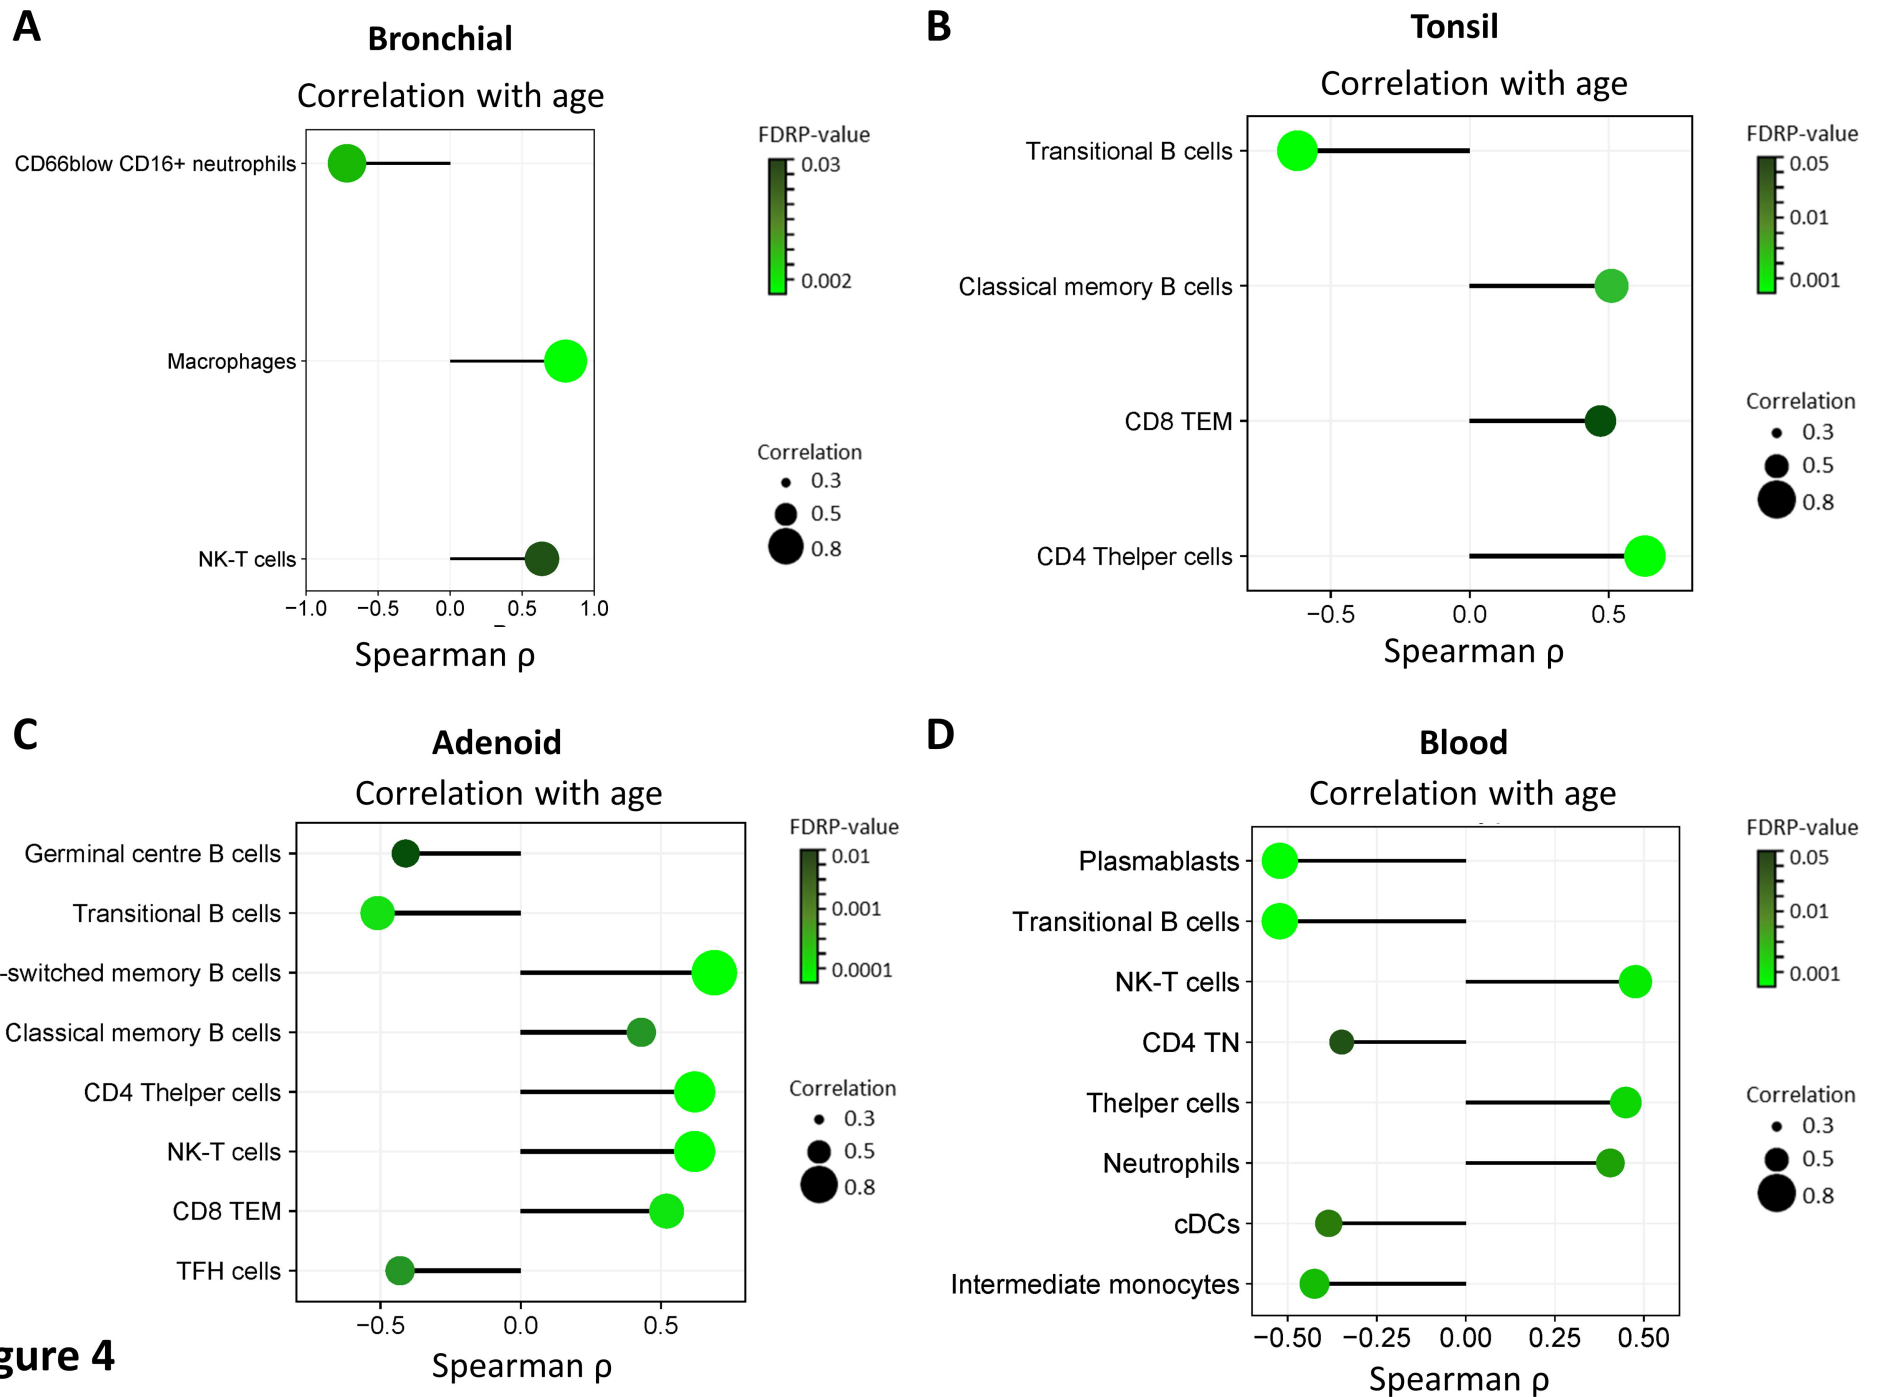

**Figure 4**

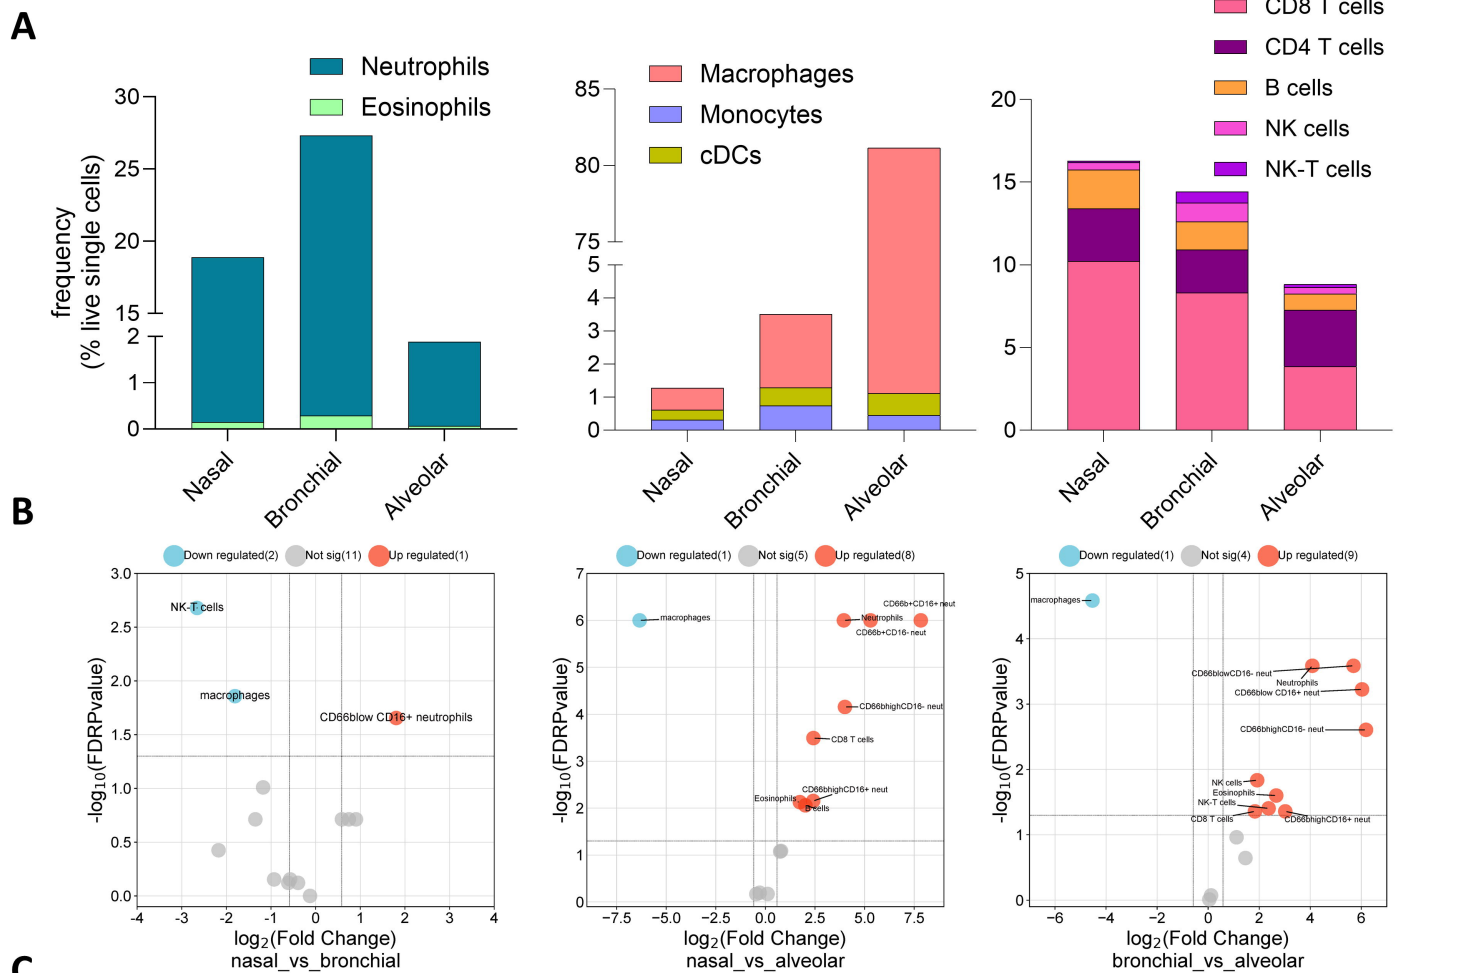

**Figure 5**

**A**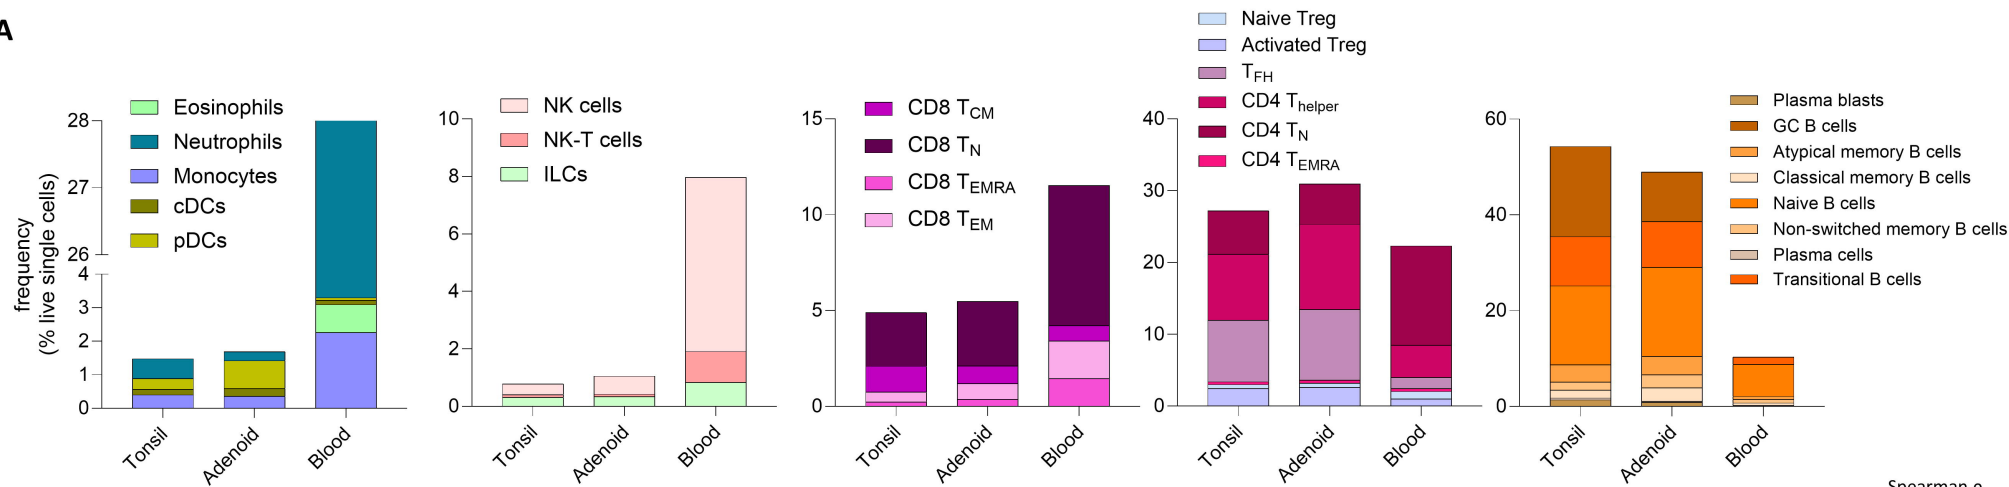**B**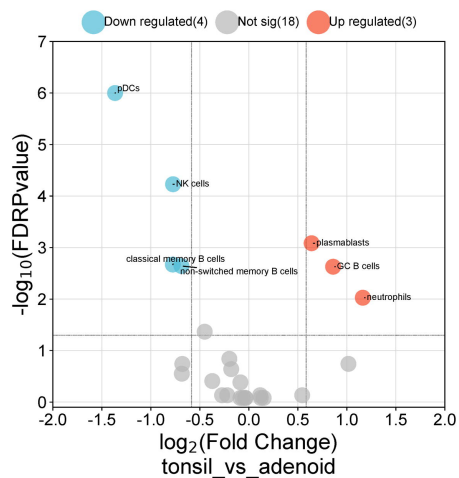**C**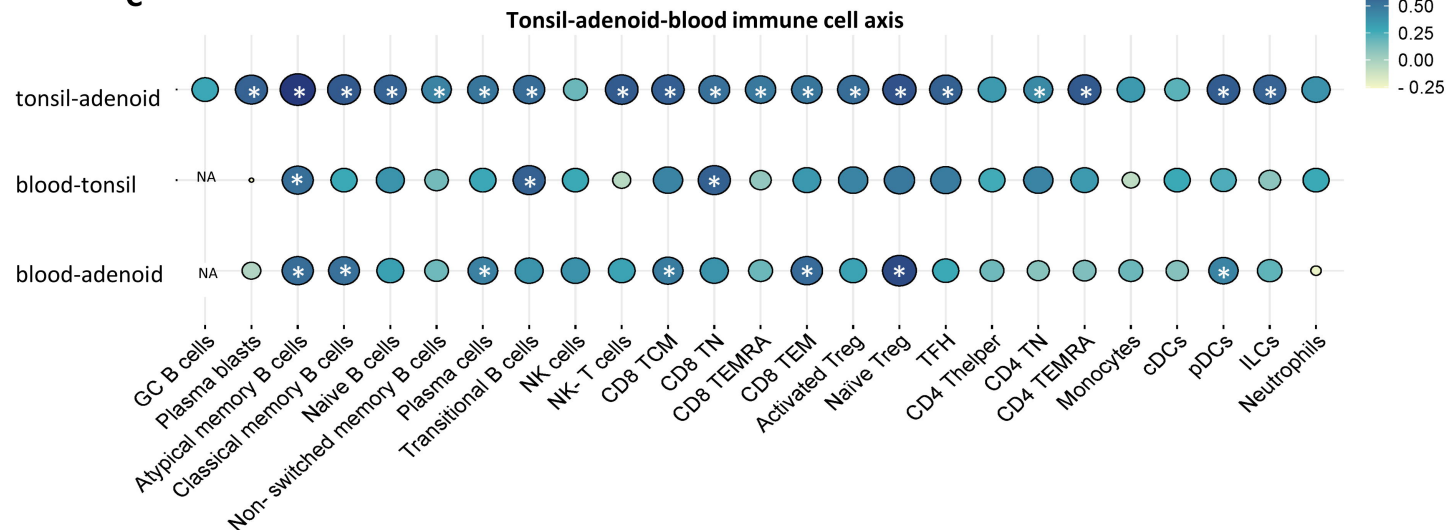**Figure 6**
